# Supplementary material for: Prognostic value of age, subglottic, and anterior commissure involvement for early glottic carcinoma treated with CO2 laser transoral microsurgery: a retrospective, single-center cohort study of 261 patients
Source: Springer Nature journal article supplement (doi:10.1007/s00405-018-4890-y), 2018-02-13
Supplement: MOESM1 [file 15462038]

## Sheet: Foglio 1
N°	Pt	N. Clinical Chart	XXXX	day of birth	month of birth	year of birth	Birth	Age at the operation time	Sex	Smoking habits: 0=no; 1=yes	Alcohol	Gastro-oesophageal reflux	day of surgery	month of surgery	year of surgery	Surgery	Age at the operaion Age at the operation time	Smoke	Alcool	Gastro-esophageal reflux	Other pathologies	History for neoplasms (0=no; 1=personal; 2=familiar)	Previos laryngeal surgery	RT pre-operatoria (no=0 ; RT=1; CT=2)	Incisional biopsies	Side (1=dx 2=sn)		Cordectomies	subglottic spreade	Operatore	Day of surgery	Month of surgery	Year of surgery	SURGERY	AGE AT SURGERY	pTNM: categoria post chirurgica (Tis=0; T1a=1; T1b=2; T2=3; T3=4; non specificato=5)	Grading	AC involvement(no=0, yes=1)	Rucci	Hospital stay	Adjuvant RT-CHT (0=no; 1=RT; 2=CHT; 3 after relapse)	Dose RT		Day last control	Month last control	Year last control	LAST CONTROL	Status
1	BA		XXXX	21	4	1937	1937.3	56	1	1	0	0	1	10	1993	1993.75	56.4452	0	0	0			13/09/1993 Decorticazione c.v. dx: Ca epidermoide			0		2	0	R. Puxeddu	1	10	1993	1993.75	56.4452	1	1	0	0	7	0			15	1	1999	1999.04	NED
2	PE		XXXX	22	10	1925	1925.81	69	0	1	0	0	21	4	1994	1994.3	68.4973	1	0	0			12/03/1992 Exeresi di verruca spinosa c.v. dx: displasia lieve e moderata; 14/07/1992 Decorticazione c.v. dx: verruca ipercheratosica; 11/05/1993 Decorticazione c.v. dx e sn: ipercheratosi e iperacantosi			0		5a	0	R. Puxeddu	21	4	1994	1994.3	68.4973	1	1	1	1	6	0			1	2	1996	1996.08	DOC
3	FA		XXXX	4	3	1936	1936.17	58	0	1	1	0	13	9	1994	1994.7	58.5247	0	0	0			08/08/1994 Decorticazione c.v. sn: ca spinocell corneificante infiltrante			0		3	0	R. Puxeddu	13	9	1994	1994.7	58.5247	1	1	0	0	7	0			22	11	2000	2000.89	NED
4	UL		XXXX	14	6	1937	1937.45	57	0	1	0	0	14	9	1994	1994.7	57.25	0	0	0			04/08/1994 Asportazione neoform c.v. sn: ca epidermoide cheratinizzante			0		5a	0	R. Puxeddu	14	9	1994	1994.7	57.25	2	1	1	2	9	0			15	9	2005	2005.71	DOC
5	DG		XXXX	29	5	1918	1918.41	76	0	1	1	0	19	9	1994	1994.72	76.3059	0	0	0			04/08/1994 Decorticazione c.v. dx e sn e comm ant: ca epidermoide			0		5a	0	R. Puxeddu	19	9	1994	1994.72	76.3059	2	1	1	2	9	3	74 Gy (Cicli di 2 Gy/die)		15	3	1997	1997.21	DOC
6	NA		XXXX	5	6	1944	1944.43	50	0	1	1	0	18	10	1994	1994.8	50.3689	1	3	0			26/09/1994 Decorticazione c.v. dx: ca epidermoide			0		5ab	0	R. Puxeddu	18	10	1994	1994.8	50.3689	3	2	1	2	6	0			15	10	1998	1998.79	DOC
7	CM		XXXX	12	11	1927	1927.86	67	0	1	1	0	27	10	1994	1994.82	66.9578	0	1	0						0		3	0	R. Puxeddu	27	10	1994	1994.82	66.9578	1	1	0	0	5	0			9	1	2002	2002.02	NED
8	PG		XXXX	3	11	1925	1925.84	69	0	1	0	0	6	12	1994	1994.93	69.0916	2								0		3	0	R. Puxeddu	6	12	1994	1994.93	69.0916	0	1	0	0	3	0			25	9	1998	1998.73	NED
9	MR		XXXX	25	5	1927	1927.4	68	0	0	0	0	2	2	1995	1995.09	67.687	0	0	0						0		3	0	R. Puxeddu	2	2	1995	1995.09	67.687	1	1	0	0	3	0			1	2	1998	1998.08	DOC
10	FE		XXXX	15	10	1926	1926.79	69	0	0	1	0	27	3	1995	1995.24	68.4495	2	0	0						0		4	0	R. Puxeddu	27	3	1995	1995.24	68.4495	2	1	0	0	7	0			5	4	2002	2002.26	REC
11	NQ		XXXX	8	8	1918	1918.6	77	0	1	1	0	3	4	1995	1995.26	76.653	2	2	0						0		5a	0	R. Puxeddu	3	4	1995	1995.26	76.653	1	3	0	0	7	0			27	8	1999	1999.65	NED
12	JL		XXXX	25	11	1924	1924.9	70	0	1	1	0	27	4	1995	1995.32	70.4221	0	2	0	Ipertensione arteriosa					0		2	0	R. Puxeddu	27	4	1995	1995.32	70.4221	1	1	0	0	3	0			27	5	1995	1995.4	NED
13	SM		XXXX	14	10	1944	1944.79	51	0	1	1	0	16	5	1995	1995.37	50.5888	2	0	0						0		3	0	R. Puxeddu	16	5	1995	1995.37	50.5888	1	2	0	0	6	0			28	9	2002	2002.74	NED
14	MS		XXXX	28	7	1924	1924.57	71	0	1	1	0	28	7	1995	1995.57	71	2	2	0						0		5ab	0	R. Puxeddu	28	7	1995	1995.57	71	1	1	1	1	6	0			28	7	2005	2005.57	DOC
15	CG		XXXX	3	10	1931	1931.76	64	0	1	1	0	6	10	1995	1995.76	64.0082	0	2	0	osteomielite arto inferiore sn (postraumatica) ; cataratta occhio dx					0		4	0	R. Puxeddu	6	10	1995	1995.76	64.0082	1	2	1	1	6	0			23	10	2002	2002.81	NED
16	FA		XXXX	23	9	1943	1943.73	52	0	1	1	0	12	12	1995	1995.95	52.2199	2	0	0						0		5b	0	R. Puxeddu	12	12	1995	1995.95	52.2199	1	3	0	0	6	0			7	10	2002	2002.77	NED
17	SV		XXXX	8	1	1923	1923.02	72	0	0	1	0	14	12	1995	1995.95	72.9331	2	0	0						0		3	0	R. Puxeddu	14	12	1995	1995.95	72.9331	0	1	0	0	4	0			30	9	2002	2002.75	NED
18	AE		XXXX	29	6	1930	1930.49	65	0	0	1	0	21	12	1995	1995.97	65.4781	0	0	0					si (07/12/1995)	0		5a	0	R. Puxeddu	21	12	1995	1995.97	65.4781	3	1	1	2	4	0			30	9	2002	2002.75	NED
19	ZA		XXXX	12	12	1920	1920.95	76	0	1	1	1	28	1	1996	1996.07	75.1272	0	0	1			11/10/1994: Decorticazione c.v. sn: Carcinoma basospinocellulare scarsamente differenziato, spiccatamente anaplasico	RT nel 1994 dopo decorticazione		0		4	0	R. Puxeddu	28	1	1996	1996.07	75.1272	1	3	0	0	4	0	ATCD di RT: 60 Gy (Cicli di 200 cGy)		6	9	2002	2002.68	NED
20	DL		XXXX	19	3	1921	1921.22	75	0	1	1	0	1	3	1996	1996.17	74.9507	2	0	0						0		3	0	R. Puxeddu	1	3	1996	1996.17	74.9507	1	1	0	0	6	0			5	6	2002	2002.43	NED
21	MA		XXXX	5	1	1949	1949.01	47	0	1	0	0	11	3	1996	1996.19	47.1831	2	0	0						0		2	0	R. Puxeddu	11	3	1996	1996.19	47.1831	1	2	0	0	7	0			16	1	2002	2002.04	NED
22	GB		XXXX	3	12	1922	1922.92	74	0	1	1	0	16	4	1996	1996.29	73.3689	2	3	0						0		5a	0	R. Puxeddu	16	4	1996	1996.29	73.3689	2	2	1	2	24	0			1	5	2000	2000.33	DOC
23	FP		XXXX	26	12	1925	1925.99	71	0	1	1	0	27	6	1996	1996.49	70.5027	2	0	0						0		5a	0	R. Puxeddu	27	6	1996	1996.49	70.5027	0	1	1	2	9	0			13	9	2002	2002.7	NED
24	FV		XXXX	11	9	1942	1942.69	54	0	1	1	0	28	8	1996	1996.66	53.9632	0	0	0						0		3	0	R. Puxeddu	28	8	1996	1996.66	53.9632	1	1	0	0	5	0			1	10	2013	2013.75	NED
25	FV		XXXX	13	9	1924	1924.7	72	0	1	1	0	28	8	1996	1996.66	71.9578	2	0	0						0		3	0	R. Puxeddu	28	8	1996	1996.66	71.9578	1	3	0	0	3	0			26	6	2002	2002.49	NED
26	PR	1038/2013	XXXX	12	9	1942	1942.7	54	0	1	1	0	28	8	1996	1996.66	53.9605	2	0	0	Glaucoma bilaterale	2 (3 fratelli per carcinoma polmonare, tumore osseo non specificato e carcinoma pancreatico	18/12/1989: Decorticazione c.v. sn: Processo leucoplasico; 22/03/1990: Decorticazione c.v. sn: Processo leucoplasico; 14/01/1993: Decorticazione c.v. sn: Ca spinocellulare corneificante; 08/02/1993: Cordectomia sinistra in tirotomia mediana; 22/07/1993: MLSD asportazione di neoformazione polipoide tra terzo medio e terzo ant della pseudocorda sn: Processo infiammatorio cronico produttivo aspecifi…			0		5a	0	R. Puxeddu	28	8	1996	1996.66	53.9605	1	1	1	2	7	0			15	1	2014	2014.04	NED
27	SF		XXXX	1	3	1920	1920.17	77	0	0	1	0	24	9	1996	1996.73	76.563	0	0	0						0		2	0	R. Puxeddu	24	9	1996	1996.73	76.563	0	1	0	0	6	0			20	6	2009	2009.47	DOC
28	MF		XXXX	27	7	1929	1929.57	67	0	1	0	0	17	10	1996	1996.79	67.2226	0	0	0						0		4	0	R. Puxeddu	17	10	1996	1996.79	67.2226	3	1	1	1	7	1	74 Gy - 29/06/1998 Laringite post-attinica		27	3	2002	2002.24	RT
29	LG		XXXX	3	8	1944	1944.59	53	0	1	1	0	26	2	1997	1997.15	52.563	0	1	0						0		2	0	R. Puxeddu	26	2	1997	1997.15	52.563	1	1	0	0	6	0			30	10	2002	2002.83	NED
30	MT		XXXX	10	12	1933	1933.94	64	0	1	1	0	6	5	1997	1997.35	63.4057	2	1	0						0		2	0	R. Puxeddu	6	5	1997	1997.35	63.4057	0	1	0	0	2	0			13	2	2002	2002.12	NED
31	FG		XXXX	19	1	1941	1941.05	56	0	1	1	0	26	5	1997	1997.4	56.3525	2	0	0						0		1	0	R. Puxeddu	26	5	1997	1997.4	56.3525	1	1	0	0	5	0			31	5	2002	2002.42	NED
32	MG		XXXX	15	5	1927	1927.37	70	0	1	1	0	23	6	1997	1997.48	70.1053	2	0	0						0		2	0	R. Puxeddu	23	6	1997	1997.48	70.1053	1	2	0	0	11	3			26	6	2002	2002.49	LP
33	VS		XXXX	11	11	1929	1929.86	68	0	1	1	0	16	10	1997	1997.79	67.9304	0	0	0						0		4	0	R. Puxeddu	16	10	1997	1997.79	67.9304	1	1	0	0	6	0			19	7	2002	2002.55	NED
34	MS		XXXX	30	7	1923	1923.58	75	0	1	1	0	19	2	1998	1998.13	74.5532	2	0	0						0		1	0	R. Puxeddu	19	2	1998	1998.13	74.5532	0	3	0	0	3	0			15	12	2012	2012.96	NED
35	CA		XXXX	30	11	1938	1938.91	60	0	1	1	0	25	2	1998	1998.15	59.2363	2	0	0						0		3	0	R. Puxeddu	25	2	1998	1998.15	59.2363	1	1	0	0	9	0			14	6	2002	2002.45	NED
36	LG		XXXX	4	10	1941	1941.76	57	0	1	1	0	25	2	1998	1998.15	56.3909	2	0	0						0		2	0	R. Puxeddu	25	2	1998	1998.15	56.3909	0	1	0	0	4	1	66 Gy (33 sedute) Milano 18/05/1998 - 02/07/1998		5	4	2002	2002.26	RT
37	MP		XXXX	7	12	1938	1938.93	60	0	1	1	0	2	4	1998	1998.25	59.3196	0	1	0						0		2	0	R. Puxeddu	2	4	1998	1998.25	59.3196	1	1	0	0	7	0			15	9	2000	2000.71	NED
38	VA		XXXX	28	4	1936	1936.32	61	0	1	0	0	9	4	1998	1998.27	61.9479	0	0	0						0		2	0	R. Puxeddu	9	4	1998	1998.27	61.9479	1	1	0	0	6	0			15	5	2009	2009.37	DOD
39	MC		XXXX	26	1	1924	1924.07	74	0	1	1	0	23	4	1998	1998.31	74.2418	2	1	0						0		4	0	R. Puxeddu	23	4	1998	1998.31	74.2418	3	1	0	0	9	1	RT		15	9	2010	2010.71	DOC
40	SM		XXXX	19	9	1942	1942.72	56	0	1	1	0	11	5	1998	1998.36	55.6447	2	0	0						0		2	0	R. Puxeddu	11	5	1998	1998.36	55.6447	1	3	0	0	3	0			1	10	2013	2013.75	NED
41	AA		XXXX	3	10	1927	1927.76	71	0	1	0	0	26	5	1998	1998.4	70.6463	2	0	1						0		3	0	R. Puxeddu	26	5	1998	1998.4	70.6463	1	1	0	0	8	0			26	5	2008	2008.4	DOC
42	PR		XXXX	8	2	1926	1926.1	72	0	1	1	0	2	7	1998	1998.5	72.4002	2	0	0					si (08/06/1998)	0		5b	0	R. Puxeddu	2	7	1998	1998.5	72.4002	1	2	0	0	9	0			2	7	2003	2003.5	DOC
43	PG		XXXX	25	2	1933	1933.15	65	0	1	1	0	27	7	1998	1998.57	65.4221	0	0	0						0		2	0	R. Puxeddu	27	7	1998	1998.57	65.4221	1	1	0	0	3	0			29	6	2000	2000.49	NED
44	MS		XXXX	12	6	1938	1938.45	60	0	1	1	0	21	9	1998	1998.72	60.2747	0	0	0						0		1	0	R. Puxeddu	21	9	1998	1998.72	60.2747	0	1	0	0	4	0			13	9	2002	2002.7	NED
45	BO		XXXX	13	12	1945	1945.95	53	0	1	1	0	6	10	1998	1998.76	52.8142	0	0	0						0		3	0	R. Puxeddu	6	10	1998	1998.76	52.8142	1	1	0	0	6	0			15	10	2003	2003.79	NED
46	PG		XXXX	26	5	1946	1946.4	52	0	0	0	0	27	10	1998	1998.82	52.4194	0	0	0						0		3	0	R. Puxeddu	27	10	1998	1998.82	52.4194	0	1	0	0	3	0			18	7	2001	2001.55	NED
47	FE		XXXX	17	5	1933	1933.38	55	0	1	1	0	3	3	1999	1999.17	65.795	2	0	0						0		5a	0	R. Puxeddu	3	3	1999	1999.17	65.795	2	1	1	2	11	0			30	9	2002	2002.75	NED
48	PG		XXXX	16	6	1918	1918.46	81	0	1	0	0	13	5	1999	1999.37	80.9084	0	0	0						0		5a	0	R. Puxeddu	13	5	1999	1999.37	80.9084	1	1	1	2	7	0			6	9	2002	2002.68	NED
49	MR		XXXX	10	3	1944	1944.19	55	0	1	1	0	8	7	1999	1999.52	55.3279	2	0	0	Ipertensione arteriosa				si (24/06/1999)	0		5a	0	R. Puxeddu	8	7	1999	1999.52	55.3279	2	1	1	2	2	0			30	8	2002	2002.66	NED
50	LE		XXXX	3	11	1915	1915.84	83	0	1	0	0	19	7	1999	1999.55	83.7105	0	0	0					si (24/06/1999)	0		5a	0	R. Puxeddu	19	7	1999	1999.55	83.7105	2	1	1	2	7	0			25	10	2001	2001.82	DOC
51	FC		XXXX	4	4	1932	1932.26	67	0	1	1	1	22	7	1999	1999.56	67.2993	0	0	0						0		5a	0	R. Puxeddu	22	7	1999	1999.56	67.2993	3	1	1	2	9	0			22	7	2009	2009.56	DOC
52	TM		XXXX	10	11	1936	1936.86	62	0	1	1	0	24	8	1999	1999.65	62.7884	1	0	0						0		3	0	R. Puxeddu	24	8	1999	1999.65	62.7884	1	1	0	0	6	0			24	8	2009	2009.65	DOC
53	NG		XXXX	31	3	1924	1924.25	75	0	1	1	0	4	10	1999	1999.76	75.5094	1	0	0						0		3	0	R. Puxeddu	4	10	1999	1999.76	75.5094	1	1	0	0	6	0			15	10	2007	2007.79	DOC
54	DS		XXXX	24	12	1932	1932.98	67	0	1	1	1	29	11	1999	1999.91	66.9304	0	0	1						0		1	0	R. Puxeddu	29	11	1999	1999.91	66.9304	0	1	0	0	9	0			15	3	2003	2003.21	DOC
55	AA		XXXX	1	8	1938	1938.58	61	0	1	0		2	12	1999	1999.92	61.3361	2					30/04/1997: Exeresi di neoformazione granulomatosa e di area leucoeritroplasica circostante. Esame istologico: neoproduzione fibroangiomatosa con area di necrosi superficiale e atipie cellulari. Indagini immunoistochimica: positività per la vimentina e negatività per le citocheratine. Focali mitosi.			0		1	0	R. Puxeddu	2	12	1999	1999.92	61.3361	0	1	0	0	3	0			18	7	2005	2005.55	NED
56	CG		XXXX	17	5	1949	1949.38	50	0	1	0	0	7	12	1999	1999.93	50.5559	0	0	0						0		5c	0	R. Puxeddu	7	12	1999	1999.93	50.5559	1	1	0	0	3	0			15	3	2013	2013.21	NED
57	MA		XXXX	29	10	1921	1921.83	78	0	1	1	0	20	12	1999	1999.97	78.142	0	0	0						0		3	0	R. Puxeddu	20	12	1999	1999.97	78.142	1	1	0	0	3	0			15	3	2013	2013.21	NED
58	SF		XXXX	1	3	1951	1951.17	48	0	1	1	1	10	2	2000	2000.11	48.9413	1	0	1						0		2	0	R. Puxeddu	10	2	2000	2000.11	48.9413	0	1	0	0	5	0			15	3	2013	2013.21	NED
59	CS		XXXX	29	11	1944	1944.91	55	0	1	1	0	14	2	2000	2000.12	55.2089	1	0	0						0		5a	0	R. Puxeddu	14	2	2000	2000.12	55.2089	2	2	1	2	7	0			15	6	2007	2007.46	NED
60	PB		XXXX	16	12	1944	1944.96	55	0	1	1	0	2	5	2000	2000.34	55.3783	2	0	0						0		1	0	R. Puxeddu	2	5	2000	2000.34	55.3783	0	2	0	0	5	0			15	5	2011	2011.37	NED
61	CS		XXXX	8	4	1936	1936.27	64	0	1	1	0	30	5	2000	2000.41	64.1436	1	0	0						0		5a	0	R. Puxeddu	30	5	2000	2000.41	64.1436	2	1	1	2	4	0			15	6	2006	2006.46	NED
62	SM		XXXX	28	4	1925	1925.32	75	0	1	1	0	4	7	2000	2000.51	75.1842	0	0	0						0		2	0	R. Puxeddu	4	7	2000	2000.51	75.1842	1	1	0	0	3	0			15	6	2005	2005.46	NED
63	PGA		XXXX	1	1	1950	1950		0	1	0		6	7	2001	2001.51	51.5137	2								0		5acd	0		6	7	2001	2001.51	65	3	2	1	1					6	7	2004	2004.51	NED
64	PV		XXXX	23	7	1931	1931.56	68	0	1	1	0	8	7	2000	2000.52	68.9589	1	0	0						0		3	0	R. Puxeddu	8	7	2000	2000.52	68.9589	1	1	0	0	5	0			15	6	2007	2007.46	NED
65	MF		XXXX	3	9	1927	1927.67	72	0	1	1	0	7	8	2000	2000.6	72.9276	2	2	0						0		4	0	R. Puxeddu	7	8	2000	2000.6	72.9276	1	1	0	0	7	0			6	9	2002	2002.68	DOC
66	DF		XXXX	27	10	1931	1931.82	68	0	1	1	0	24	8	2000	2000.65	68.8251	0	2	0						0		4	0	R. Puxeddu	24	8	2000	2000.65	68.8251	1	1	0	0	5	0			15	6	2007	2007.46	NED
67	LG		XXXX	18	3	1942	1942.21	58	0	1	1	1	31	10	2000	2000.83	58.6189	1	0	1						0		3	0	R. Puxeddu	31	10	2000	2000.83	58.6189	1	2	0	0	6	0			15	6	2007	2007.46	NED
68	PG		XXXX	11	1	1934	1934.03	66	0	1	1	0	7	11	2000	2000.85	66.8224	0	0	0						0		1	0	R. Puxeddu	7	11	2000	2000.85	66.8224	1	1	0	0	3	0			15	3	2013	2013.21	NED
69	BD		XXXX	23	10	1944	1944.81	56	0	1	1	0	22	11	2000	2000.89	56.0806	2	2	0						0		5a	0	R. Puxeddu	22	11	2000	2000.89	56.0806	1	1	1	1	5	0			15	6	2007	2007.46	NED
70	FG		XXXX	5	5	1936	1936.34	64	0	1	1	0	18	12	2000	2000.96	64.6189	2	2	0	dispnea ric med ca					0		5a	0	R. Puxeddu	18	12	2000	2000.96	64.6189	3	2	1	1	5	0			15	6	2006	2006.46	NED
71	PA		XXXX	29	9	1937	1937.74	64	0	1	1	0	9	1	2001	2001.02	63.2785	2	2	0						0		5a	0	R. Puxeddu	9	1	2001	2001.02	63.2785	1	1	1	2	6	0			15	6	2007	2007.46	NED
72	AR		XXXX	10	6	1946	1946.44	54	0	1	1	0	22	1	2001	2001.06	54.6162	1	0	0						0		2	0	R. Puxeddu	22	1	2001	2001.06	54.6162	1	1	0	0	7	0			15	1	2006	2006.04	NED
73	PM		XXXX	20	10	1942	1942.8	48	0	1	1	1	1	2	2001	2001.08	58.2813	0	0	0				1	si (07/06/2000 Osp Tempio)	0		4	0	R. Puxeddu	1	2	2001	2001.08	58.2813	1	1	0	0	6	0			15	3	2013	2013.21	NED
74	SE		XXXX	4	3	1924	1924.17	77	1	0	0	0	9	4	2001	2001.27	77.097	0	0	0						0		3	0	R. Puxeddu	9	4	2001	2001.27	77.097	1	1	0	0	6	0			15	11	2011	2011.87	NED
75	PG		XXXX	28	7	1961	1961.57	40	0	1	1	0	9	4	2001	2001.27	39.6979	2	2	0					si (12/03/2001 Osp Nuoro: biopsie random)	0		3	0	R. Puxeddu	9	4	2001	2001.27	39.6979	1	1	0	0	6	0			15	3	2013	2013.21	NED
76	CE		XXXX	18	10	1935	1935.8	65	0	1	1	0	15	5	2001	2001.37	65.5751	2	2	0						0		5a	0	R. Puxeddu	15	5	2001	2001.37	65.5751	2	1	1	2	5	0			15	6	2007	2007.46	NED
77	CA		XXXX	8	4	1929	1929.27	72	0	1	1	0	4	6	2001	2001.42	72.1557	1	0	0						0		4	0	R. Puxeddu	4	6	2001	2001.42	72.1557	1	2	0	0	3	0			15	6	2007	2007.46	NED
78	ML		XXXX	21	1	1958	1958.05	43	0	1	1	0	9	7	2001	2001.52	43.4671	0	0	0						0		1	0	R. Puxeddu	9	7	2001	2001.52	43.4671	1	1	0	0	9	0			15	3	2013	2013.21	NED
79	FB		XXXX	2	1	1944	1944	57	0	1	1	1	9	7	2001	2001.52	57.5192	0	0	0					Biopsia presso altra Struttura (Giugno 2001)	0		5ac	0	R. Puxeddu	9	7	2001	2001.52	57.5192	1	1	0	0	6	0			9	7	2006	2006.52	NED
80	LG		XXXX	6	10	1933	1933.76	67	0	1	1	0	29	8	2001	2001.66	67.8963	2	2	0						0		3	0	R. Puxeddu	29	8	2001	2001.66	67.8963	1	1	0	0	7	0			15	6	2007	2007.46	NED
81	AG		XXXX	20	7	1943	1943.55	57	0	1	1	0	29	8	2001	2001.66	58.108	2	2	0						0		2	0	R. Puxeddu	29	8	2001	2001.66	58.108	1	1	0	0	3	0			15	6	2007	2007.46	NED
82	CV		XXXX	19	5	1926	1926.38	75	0	1	1	1	9	10	2001	2001.77	75.3893	0	0	0						0		4	0	R. Puxeddu	9	10	2001	2001.77	75.3893	2	1	1	2	3	0			15	6	2007	2007.46	NED
83	MA		XXXX	10	12	1928	1928.94	73	0	1	0		15	10	2001	2001.79	72.847	2								0		4	0	R. Puxeddu	15	10	2001	2001.79	72.847	2	1	1	2	3	0			15	6	2007	2007.46	NED
84	CA		XXXX	19	1	1945	1945.05	56	0	1	1	0	24	10	2001	2001.81	56.7637	2	2	0						0		5bc	0	R. Puxeddu	24	10	2001	2001.81	56.7637	1	1	0	0	8	0			15	6	2005	2005.46	NED
85	MA		XXXX	2	5	1934	1934.34	67	0	1	1	1	25	10	2001	2001.82	67.4797	0	0	0	fibrosi polmonare					0		2	0	R. Puxeddu	25	10	2001	2001.82	67.4797	1	1	0	0	3	0			15	3	2004	2004.21	DOC
86	CW		XXXX	20	4	1954	1954.3	47	0	1	1	1	8	11	2001	2001.85	47.5505	2	2	1						0		3	0	R. Puxeddu	8	11	2001	2001.85	47.5505	1	1	0	0	9	0			8	11	2006	2006.85	NED
87	SG		XXXX	8	9	1938	1938.69	63	0	1	1	1	13	11	2001	2001.87	63.1804	0	0	0						0		2	0	R. Puxeddu	13	11	2001	2001.87	63.1804	1	1	0	0	5	0			23	1	2004	2004.06	NED
88	PF		XXXX	29	11	1932	1932.91	69	0	1	1	0	5	12	2001	2001.93	69.0176	1	0	0						0		1	0	R. Puxeddu	5	12	2001	2001.93	69.0176	0	2	0	0	3	0			15	12	2010	2010.96	DOC
89	CG		XXXX	1	6	1935	1935.42	66	0	1	0	0	5	12	2001	2001.93	66.511	0	0	0						0		5a	0	R. Puxeddu	5	12	2001	2001.93	66.511	3	1	1	2	7	0			15	3	2013	2013.21	NED
90	MI		XXXX	6	11	1966	1966.85	35	1	1	0	0	20	12	2001	2001.97	35.1217	0	0	0						0		1	0	R. Puxeddu	20	12	2001	2001.97	35.1217	0	1	0	0	3	0			20	1	2002	2002.05	NED
91	RB		XXXX	20	5	1919	1919.39	82	0	1	1	0	16	1	2002	2002.04	82.6557	1	0	0	1994: Lobectomia polmonare sinistra + RT (neoplasia maligna)					0		5abc	0	R. Puxeddu	16	1	2002	2002.04	82.6557	3	2	1	2	7	0			15	7	2004	2004.54	DOD
92	AN		XXXX	13	6	1940	1940.45	62	0	1	0	0	19	1	2002	2002.05	61.5998	0	0	0						0		1	0	R. Puxeddu	19	1	2002	2002.05	61.5998	0	1	0	0	2	0			1	10	2013	2013.75	NED
93	FT		XXXX	5	8	1934	1934.59	67	0	1	1	0	31	1	2002	2002.08	67.4879	1	0	0	carcinoma rettale ; insufficienza venosa arti inferiori					0		2	0	R. Puxeddu	31	1	2002	2002.08	67.4879	0	1	0	0	4	0			15	3	2013	2013.21	NED
94	FL		XXXX	14	11	1923	1923.87	78	0	1	1	1	11	2	2002	2002.11	78.2418	0	0	0	nodulo tiroideo all'ecografia					0		5a	0	R. Puxeddu	11	2	2002	2002.11	78.2418	2	1	1	2	3	0			15	6	2013	2013.46	DOC
95	DAPP	253	XXXX	24	10	1940	1940.81	61	0	1	1	1	21	2	2002	2002.14	61.3251	1	1	0						0		5c	0	R. Puxeddu	21	2	2002	2002.14	61.3251	1	1	0	0	3	0			15	7	2013	2013.54	NED
96	PA		XXXX	4	12	1946	1946.92	55	0	1	1	0	21	2	2002	2002.14	55.2132	1	0	0						0		3	0	R. Puxeddu	21	2	2002	2002.14	55.2132	1	1	0	0	3	0			15	3	2013	2013.21	NED
97	OF		XXXX	27	2	1938	1938.15	65	0	1	1	1	6	3	2002	2002.18	64.0258	1	1	0						0		3	0	R. Puxeddu	6	3	2002	2002.18	64.0258	1	1	0	0	8	0			15	3	2013	2013.21	NED
98	MG		XXXX	25	2	1917	1917.15	85	0	1	1	0	14	3	2002	2002.2	85.0532	1	0	0	carcinoma vescicale ; aritmia cardiaca ; aneurisma aorta addominale					0		3	0	R. Puxeddu	14	3	2002	2002.2	85.0532	1	1	1	2	7	0			15	3	2004	2004.21	DOC
99	AM		XXXX	3	2	1943	1943.09	59	0	1	1	0	14	3	2002	2002.2	59.1135	1	0	0	cardiopatia ipertensiva				si (20/12/2001 Osp Nuoro: biopsie random)	0		3	0	R. Puxeddu	14	3	2002	2002.2	59.1135	1	1	1	1	6	0			15	6	2007	2007.46	NED
100	CR		XXXX	6	1	1944	1944.01	58	0	1	0	0	22	3	2002	2002.22	58.2105	0	0	0	ipertensione arteriosa ; ipercolesterolemia		05/09/2001: MLSD Leuco 1/3 ant c.v. sn: Iperplasia verrucosa con atipie cellulari			0		1	0	R. Puxeddu	22	3	2002	2002.22	58.2105	1	1	0	0	3	0			22	3	2007	2007.22	NED
101	RG		XXXX	26	2	1946	1946.15	56	0	1	1	0	15	5	2002	2002.37	56.2199	1	0	0						0		3	0	R. Puxeddu	15	5	2002	2002.37	56.2199	2	1	0	0	7	0			1	10	2014	2014.75	NED
102	CR		XXXX	18	4	1923	1923.3	79	0	1	1	0	3	6	2002	2002.42	79.1256	0	2	0	ipertensione arteriosa ; fibrillazione atriale , ipertrofia prostatica ; Marzo 2000 int chir per idrocele destro		1992-1997 N° 3 interventi di decorticazione corde vocali eseguiti presso Cl ORL Università Sassari (non conosce istologico) ; 27/01/1997 MLSD Laser CO2 - Biopsia escissionale cv sn e asportazione di leucoplachia cv dx: Iperplasia verrucosa proliferativa, neoplasia (ipercheratosi) lambisce margini superiore e inferiore cv dx e anteriore, posteriore e superiore cv sn ; 21/04/1998 MLSD Laser CO2 Muc…			0		2	0	R. Puxeddu	3	6	2002	2002.42	79.1256	1	1	0	0	21	0			15	6	2007	2007.46	NED
103	OV		XXXX	13	11	1957	1957.87	44	1	0	0	1	10	6	2002	2002.44	44.5751	0	0	1						0		2	0	R. Puxeddu	10	6	2002	2002.44	44.5751	0	1	0	0	3	0			15	6	2007	2007.46	NED
104	OS		XXXX	24	12	1939	1939.98	62	0	1	1	1	8	7	2002	2002.52	62.5395	0	0	1						0		5b	0	R. Puxeddu	8	7	2002	2002.52	62.5395	1	1	0	0	4	0			15	6	2007	2007.46	NED
105	AB		XXXX	30	10	1928	1928.83	73	0	1	1	0	11	7	2002	2002.53	73.6979	0	2	0	BPCO					0		2	0	R. Puxeddu	11	7	2002	2002.53	73.6979	1	1	0	0	3	0			156	10	2006	2007.17	NED
106	PL		XXXX	27	11	1952	1952.9	49	0	1	1	0	24	7	2002	2002.56	49.6584	2	2	0						0		3	0	R. Puxeddu	24	7	2002	2002.56	49.6584	1	1	0	0	3	0			15	6	2007	2007.46	NED
107	PA		XXXX	8	12	1933	1933.94	78	0	1	1	0	31	7	2002	2002.58	68.6463	2	2	0	Ipertensione arteriore ; ipercolesterolemia					0		5a	0	R. Puxeddu	31	7	2002	2002.58	68.6463	2	1	1	2	7	0			15	6	2007	2007.46	NED
108	SG		XXXX	10	7	1931	1931.52	71	0	0	1	0	30	9	2002	2002.75	71.2215	0	1	0	Dibete mellito tipo 2°					0		3	0	R. Puxeddu	30	9	2002	2002.75	71.2215	1	1	0	0	3	0			15	6	2007	2007.46	NED
109	DE		XXXX	14	6	1948	1948.45	54	0	1	0	0	30	9	2002	2002.75	54.2938	0	0	0			10/05/2001: MLSD Biopsia escissionale leucoplasia bilaterale ; 22/07/2002: MLSD Biopsia escissionale leucoplasia corda vocale destra. Esame istologico: ca in situ			0		2	0	R. Puxeddu	30	9	2002	2002.75	54.2938	2	1	1	1	3	0			15	6	2007	2007.46	NED
110	DE		XXXX	16	1	1930	1930.04	72	0	1	1	0	7	11	2002	2002.85	72.8087	0	1	0	Cardiopatia ischemica: 3 by-pass aorto-coronarici ; Leucemia linfatica cronica					0		2	0	R. Puxeddu	7	11	2002	2002.85	72.8087	1	1	0	0	3	0			15	10	2007	2007.79	DOC
111	OM		XXXX	5	12	1950	1950.93	51	0	1	1	0	27	11	2002	2002.9	51.9769	1	1	0						0		2	0	R. Puxeddu	27	11	2002	2002.9	51.9769	2	3	1	2	3	0			15	6	2008	2008.46	NED
112	LGB		XXXX	30	4	1941	1941.33	61	0	1	1	0	23	12	2002	2002.98	61.6475	0	1	0						0		2	0	R. Puxeddu	23	12	2002	2002.98	61.6475	1	1	0	0	3	0			23	1	2003	2003.06	NED
113	SP		XXXX	1	11	1922	1922.83	80	0	1	0	0	8	1	2003	2003.02	80.1858	0	0	0						0		2	0	R. Puxeddu	8	1	2003	2003.02	80.1858	1	1	0	0	3	0			15	4	2007	2007.29	DOC
114	DAG		XXXX	19	7	1942	1942.55	60	0	1	1	0	23	1	2003	2003.06	60.511	0	0	0	Cirrosi epatica					0		5a	0	R. Puxeddu	23	1	2003	2003.06	60.511	3	1	1	2	4	0			23	1	2008	2008.06	DOC
115	SPF		XXXX	27	4	1946	1946.32	56	0	0	1	0	24	2	2003	2003.15	56.8251	0	2	0					11/12/2002: MLSD Biopsia incisionale (altra Struttura): Carcinoma in situ	0		3	0	R. Puxeddu	24	2	2003	2003.15	56.8251	1	1	0	0	3	0			24	2	2013	2013.15	NED
116	MS		XXXX	24	3	1946	1946.23	56	0	1	1	0	5	3	2003	2003.18	56.9479	0	2	0						0		5a	0	R. Puxeddu	5	3	2003	2003.18	56.9479	2	2	0	0	4	0			5	3	2013	2013.18	NED
117	MP		XXXX	21	11	1942	1942.89	60	0	1	1	0	17	3	2003	2003.21	60.3224	0	2	0						0		2	0	R. Puxeddu	17	3	2003	2003.21	60.3224	0	1	0	0	3	0			15	4	2003	2003.29	DOC
118	CG		XXXX	12	7	1934	1934.53	68	0	0	0	0	25	3	2003	2003.23	68.7023	0	0	0	ipertensione arteriosa ; fibrillazione atriale					0		5a	0	R. Puxeddu	25	3	2003	2003.23	68.7023	2	2	1	2	3	0			15	6	2007	2007.46	NED
119	SL		XXXX	3	8	1924	1924.59	79	0	1	1	0	2	4	2003	2003.25	78.6639	0	2	0	Cardipatia ischemica-ipertensiva ; 2 I.M.A.					0		2	0	R. Puxeddu	2	4	2003	2003.25	78.6639	2	1	1	2	3	0			15	6	2006	2006.46	NED
120	CF		XXXX	24	2	1927	1927.15	76	0	1	1	0	14	4	2003	2003.29	76.1393	0	2	0	Ipertensione arteriosa					0		3	0	R. Puxeddu	14	4	2003	2003.29	76.1393	1	1	0	0	3	0			15	12	2005	2005.96	DOC
121	PR		XXXX	11	7	1912	1912.53	90	0	0	1	0	21	5	2003	2003.39	90.8607	0	2	0	Ipertensione arteriosa ; diabete mellito tipo II					0		2	0	R. Puxeddu	21	5	2003	2003.39	90.8607	1	1	0	0	3	0			15	6	2006	2006.46	NED
122	ZF		XXXX	21	5	1939	1939.39	64	0	1	1	0	3	6	2003	2003.42	64.034	0	2	0						0		5a	0	R. Puxeddu	3	6	2003	2003.42	64.034	3	1	1	2	3	0			15	6	2007	2007.46	NED
123	PG		XXXX	17	10	1948	1948.79	54	0	1	0	0	26	6	2003	2003.49	54.6913	0	0	0	Poliposi nasosinusale					0		5abcd	1	R. Puxeddu	26	6	2003	2003.49	54.6913	3	2	1	1	5	0			23	10	2012	2012.81	NED
124	PP		XXXX	25	4	1943	1943.32	60	0	1	1	0	8	7	2003	2003.52	60.2034	1	2	0			2000: 2 MLSD: biopsia incisionale cv dx (altra Struttura); 2001: Cordectomia tipo III cv dx (altra Struttura): Ca squamocellulare			0		2	0	R. Puxeddu	8	7	2003	2003.52	60.2034	2	1	1	1	2	0			11	2	2013	2013.11	NED
125	MN		XXXX	10	12	1933	1933.94	69	0	0	1	0	22	7	2003	2003.56	69.6162	0	1	0	Ipertensione arteriosa					0		1	0	R. Puxeddu	22	7	2003	2003.56	69.6162	1	1	0	0	2	0			31	1	2013	2013.08	NED
126	MF		XXXX	25	3	1950	1950.23	53	0	0	1	0	23	7	2003	2003.56	53.3279	0	2	0						0		1	0	R. Puxeddu	23	7	2003	2003.56	53.3279	1	1	0	0	2	0			15	6	2010	2010.46	NED
127	RG		XXXX	24	5	1934	1934.4	69	0	1	1	0	8	9	2003	2003.69	69.2895	0	2	0	Ipertensione arteriosa ; diabete mellito tipo II					0		5a	0	R. Puxeddu	8	9	2003	2003.69	69.2895	3	1	1	2	7	0			8	9	2008	2008.69	NED
128	SG		XXXX	1	11	1932	1932.83	70	1	1	1	1	9	9	2003	2003.69	70.8553	0	2	1	Cardiopatia ischemica					0		2	0	R. Puxeddu	9	9	2003	2003.69	70.8553	1	1	0	0	2	0			9	9	2011	2011.69	NED
129	PE		XXXX	31	1	1931	1931.08	72	0	1	1	0	14	10	2003	2003.79	72.7034	0	2	0	Diabete mellito tipo II ; Artrite reumatoide					0		2	0	R. Puxeddu	14	10	2003	2003.79	72.7034	1	1	0	0	9	0			13	7	2010	2010.53	NED
130	VM		XXXX	28	7	1941	1941.57	62	0	1	1	0	21	10	2003	2003.8	62.2308	0	2	0						0		3	0	R. Puxeddu	21	10	2003	2003.8	62.2308	1	1	0	0	3	0			8	11	2011	2011.85	NED
131	SG		XXXX	9	3	1942	1942.19	61	0	1	1	0	18	11	2003	2003.88	61.6913	0	2	0	Epatite cronica virale B					0		2	0	R. Puxeddu	18	11	2003	2003.88	61.6913	1	1	0	0	3	0			15	6	2007	2007.46	NED
132	SS		XXXX	29	10	1931	1931.83	72	0	1	1	0	25	11	2003	2003.9	72.0724	0	2	0	Ipertensione arteriosa					0		5a	0	R. Puxeddu	25	11	2003	2003.9	72.0724	2	1	1	3	3	0			1	9	2013	2013.67	NED
133	MS		XXXX	1	4	1927	1927.25	76	0	1	1	0	2	2	2004	2004.09	76.8361	0	2	0	Ipertensione arteriosa ; Ipercolesterolemia ; Ipoacusia neurosensoriale monolaterale ; BPCO ; Vasculopatia cerebrale (7 episodi TIA)					0		5a	0	R. Puxeddu	2	2	2004	2004.09	76.8361	3	2	1	1	13	0			15	5	2004	2004.37	DOC
134	SS		XXXX	13	10	1930	1930.78	73	0	1	0	0	24	3	2004	2004.23	73.4468	0	0	0	Meningioma frontale dx: intervento nel 1996					0		5a	0	R. Puxeddu	24	3	2004	2004.23	73.4468	2	1	0	0	5	0			15	1	2013	2013.04	NED
135	BF		XXXX	2	4	1941	1941.25	63	0	1	1	0	19	4	2004	2004.3	63.0466	0	2	0	Ipercolesterolemia					0		2	0	R. Puxeddu	19	4	2004	2004.3	63.0466	1	1	0	0	2	0			15	6	2009	2009.46	NED
136	LS		XXXX	25	9	1927	1927.73	76	0	0	1	0	6	5	2004	2004.35	76.6146	0	2	0	Ipertensione arteriosa					0		5a	0	R. Puxeddu	6	5	2004	2004.35	76.6146	3	3	1	2	3	0			15	8	2008	2008.62	DOC
137	MP		XXXX	19	12	1944	1944.97	59	0	1	1	0	11	6	2004	2004.44	59.4781	0	2	0	Ipertensione arteriosa ; TIA				10/03/2004: MLSD Biopsia incisionale (altra Struttura): Carcinoma epidermoide	0		3	0	R. Puxeddu	11	6	2004	2004.44	59.4781	0	1	0	0	2	0			11	2	2013	2013.11	NED
138	TA		XXXX	25	10	1933	1933.82	70	0	0	0	0	16	6	2004	2004.46	70.642	0	0	0	Esiti di Ictus cerebrale (emiparesi dx) ; Diabete mellito tipo II					0		5a	0	R. Puxeddu	16	6	2004	2004.46	70.642	2	1	1	2	6	0			15	3	2007	2007.21	DOC
139	BA		XXXX	21	6	1951	1951.47	52	0	1	1	1	17	6	2004	2004.46	52.989	0	2	1	Gastrite emorragica					0		1	0	R. Puxeddu	17	6	2004	2004.46	52.989	1	1	0	0	2	0			15	6	2010	2010.46	NED
140	SC		XXXX	19	6	1941	1941.47	63	0	1	1	0	22	6	2004	2004.47	63.0082	0	2	0	Ipoacusia neurosensoriale					0		2	0	R. Puxeddu	22	6	2004	2004.47	63.0082	1	1	0	0	3	0			26	10	2012	2012.82	NED
141	VF		XXXX	2	8	1922	1922.59	81	0	1	1	1	22	6	2004	2004.47	81.8881	0	0	1	Esiti di Ictus cerebrale ; Diabete mellito tipo II ; Sindrome mielodisplastica ; Osteoporosi (frattura L2 e L4)					0		5b	0	R. Puxeddu	22	6	2004	2004.47	81.8881	3	1	0	0	3	0			15	6	2005	2005.46	DOC
142	MA		XXXX	20	5	1945	1945.39	59	0	0	1	0	14	7	2004	2004.54	59.1502	0	1	0	Marzo 2004: Tiroidectomia totale (Ca diff tiroide) ; Diabete mellito tipo II ; Ipertensione arteriosa		Gennaio 2004: MLSD exeresi neoformazione peduncolata c.v. dx: processo infiammatorio cronico granulomatoso ad impronta necrotizzante (altra Struttura)		Giugno 2004: persistenza della sintomatologia > MLSD Biopsia incisionale (altra Struttura): Carcinoma squamocellulare infiltrante	0		5abcd dx	0	R. Puxeddu	14	7	2004	2004.54	59.1502	3	1	1	2	20	0			15	2	2011	2011.12	NED
143	FG		XXXX	29	9	1929	1929.74	74	0	0	1	0	26	7	2004	2004.57	74.8251	0	2	0			09/06/2004: MLSD Biopsia escissionale mucosa c.v. sn e c.a.: Ca epidermoide moderatamente differenziato, ulcerato ed infiltrante; i margini di resezione sono interessati dalla proliferazione neoplastica			0		2	0	R. Puxeddu	26	7	2004	2004.57	74.8251	2	2	1	2	2	0			15	6	2007	2007.46	NED
144	SG		XXXX	26	9	1927	1927.74	77	0	0	1	0	27	9	2004	2004.74	77.0027	0	2	0	BPCO ; Ipertensione arteriosa					0		5a	0	R. Puxeddu	27	9	2004	2004.74	77.0027	2	1	1	1	4	0			27	8	2010	2010.65	NED
145	MR		XXXX	30	8	1960	1960.66	44	0	0	0	0	4	10	2004	2004.76	44.0954	0	0	0						0		4	0	R. Puxeddu	4	10	2004	2004.76	44.0954	1	2	0	0	3	0			15	12	2016	2016.96	NED
146	SA		XXXX	18	2	1953	1953.13	51	0	1	1	0	12	10	2004	2004.78	51.6502	0	1	0	Ipertensione arteriosa					0		4	0	R. Puxeddu	12	10	2004	2004.78	51.6502	1	2	0	0	2	0			12	10	2009	2009.78	NED
147	CF		XXXX	16	5	1944	1944.37	60	0	1	0	0	3	11	2004	2004.84	60.4644	0	0	0	Ipertensione arteriosa		15/02/2000: MLSD Biopsia escissionale neoformazione c.v. destra: LIN I - II			0		2	0	R. Puxeddu	3	11	2004	2004.84	60.4644	0	1	0	0	2	0			18	12	2012	2012.96	NED
148	GF		XXXX	26	8	1935	1935.65	69	0	0	0	0	11	12	2004	2004.94	69.2922	0	0	0	Ipertensione arteriosa ; Papilloma vescicale					0		5a	0	R. Puxeddu	11	12	2004	2004.94	69.2922	2	1	1	1	3	0			12	2	2013	2013.11	NED
149	LG		XXXX	13	8	1937	1937.62	67	0	1	0	0	11	12	2004	2004.94	67.3279	0	0	0	Distacco retina bilaterale					0		4	0	R. Puxeddu	11	12	2004	2004.94	67.3279	1	3	0	0	3	0			12	2	2013	2013.11	NED
150	TG		XXXX	19	8	1947	1947.63	57	0	1	1	0	11	12	2004	2004.94	57.3114	0	0	0	Calcolosi vie urinarie				Novembre 2004: MLSD Biopsia incisionale (altra Struttura): Carcinoma spinocellulare	0		2	0	R. Puxeddu	11	12	2004	2004.94	57.3114	1	1	0	0	3	0			15	3	2013	2013.21	NED
151	CR		XXXX	23	10	1948	1948.81	56	0	1	1	0	13	12	2004	2004.95	56.1393	0	1	0	Ipertensione arteriosa					0		5ab	0	R. Puxeddu	13	12	2004	2004.95	56.1393	3	2	1	2	3	0			15	12	2011	2011.96	DOC
152	MG	33/2005	XXXX	12	6	1944	1944.45	60	0	1	1	0	12	1	2005	2005.03	60.5833	0	1	0	Appendicectomia (1964), gastrectomia parziale per ulcera peptica (1975), exeresi polipo corda vocale dx (1997), colecistectomia (2003), ipertensione arteriosa in trattamento	0	1997: exeresi polipo corda vocale dx (c/o altra struttura)	0	0	0		3	0	R. Puxeddu	12	1	2005	2005.03	60.5833	1	4	0	0	3	0			15	6	2013	2013.46	NED
153	FF	170/2005	XXXX	23	3	1928	1928.23	76	0	1	0	0	7	2	2005	2005.1	76.8728	0	1	0	Emorroidectomia (1968), asma allergico (1980), DMII in trattamento (1997), ipertensione arteriosa in trattamento (1997)	0	0	0	0	0		5a	0	R. Puxeddu	7	2	2005	2005.1	76.8728	2	4	1	2	2	0			1	12	2006	2006.92	DOC
154	CF	172/2005	XXXX	26	10	1948	1948.82	56	0	1	0	0	7	2	2005	2005.1	56.2813	1	0	0	Chirurgia fistola coccigea (1977)	0	0	0	0	0		5a	0	R. Puxeddu	7	2	2005	2005.1	56.2813	2	4	1	1	2	0			5	1	2012	2012.01	NED
155	IS	315/2005	XXXX	3	12	1935	1935.92	69	0	1	1	0	28	2	2005	2005.16	69.2352	2			Appendicectomia (1960), exeresi lipoma spalla dx (1990), TBC polmonare (1997), ernioplastica ombelicale (2004), lombalgia	2 (padre: Ca laringe)	0	0	0	0		5bc	0	R. Puxeddu	28	2	2005	2005.16	69.2352	2	3	0	0	25	0			28	2	2009	2009.16	DOC
156	FG	290/2005	XXXX	11	2	1941	1941.11	64	0	1	1	0	2	3	2005	2005.17	64.0587	2			Tonsillectomia (1959), appendicectomia (1961), exeresi cisti mano dx (1980), DMII (2001), ipercolesterolemia	0	0	0	0	0		5acd	1	R. Puxeddu	2	3	2005	2005.17	64.0587	3	1	1	2	7	0			15	2	2016	2016.12	LP
157	PG	349/2005	XXXX	8	3	1950	1950.19	55	0	1	1	0	23	3	2005	2005.23	55.0411	0	1	0	Exeresi angioma coscia dx (1970), exeresi cisti sebacea piede dx (1976) exeresi seminoma testicolare dx e RT (1991), chirurgia sinus pilonidalis (1992)	1 (neoplasia testicolo, 1991); 2 (padre: Ca prostata)	0	0	0	0		5a	0	R. Puxeddu	23	3	2005	2005.23	55.0411	1	1	1	2	1	0			5	4	2011	2011.26	NED
158	AL	479/2005	XXXX	11	2	1939	1939.11	66	0	0	1	0	2	5	2005	2005.34	66.2253	0	1	0	Ernioplastica crurale (1975), ulcera duodenale (1984), corioidite (1989), ernioplastica inguinale sx (1990), mielite dorsale (1995), crisi emolitica (1996), pacemaker (2000), cordectomia dx tipo I in MLSD con laser CO2 per carcinoma (2000), cordectomia sx tipo I in MLSD con laser CO2 per displasia grave (2001)	1 (Ca corda vocale dx, 2000; displasia grave corda vocale sx, 2001)	21/12/2000: cordectomia dx tipo I in MLSD con laser CO2 (carcinoma squamocellulare, pT1a); 03/05/2001: cordectomia sx tipo I in MLSD con laser CO2 (displasia grave, pTis)	0	0	0		3	0	R. Puxeddu	2	5	2005	2005.34	66.2253	1	4	0	0	2	0			24	11	2011	2011.9	NED
159	CR	48/2006	XXXX	28	1	1958	1958.07	47	0	1	1	0	25	5	2005	2005.4	47.3251	0	2	0	Appendicectomia (1974), artrite gottosa mano dx e piedi (2005)	0	0	0	0	0		5a	0	R. Puxeddu	25	5	2005	2005.4	47.3251	2	4	1	1	3	0			12	4	2011	2011.28	NED
160	SG	571/2005	XXXX	6	6	1942	1942.43	62	0	1	1	0	25	5	2005	2005.4	62.9687	2			0	0	0	0	02/05/2005: prelievo bioptico in MLSD – carcinoma squamocellulare microinvasivo	0		5acd	1	R. Puxeddu	25	5	2005	2005.4	62.9687	3	4	1	2	1	0			20	1	2012	2012.05	NED
161	DF	608/2005	XXXX	20	10	1921	1921.8	83	0	1	1	0	7	6	2005	2005.43	83.6311	2			Malaria (1931), exeresi neoformazione cervicale (1975), prostatectomia per IPB (1995), ipertensione arteriosa, ipercolesterolemia	2 (madre: Ca colon)	0	0	0	0		5acd	1	R. Puxeddu	7	6	2005	2005.43	83.6311	3	4	1	2	2	0			15	9	2006	2006.71	DOC
162	MV	747/2005	XXXX	17	12	1952	1952.96	52	0	1	1	0	13	7	2005	2005.53	52.5724	1	0	1	Epatopatia alcolica (1985), colecistectomia (2004), cordectomia parziale sx in MLSD (2005)	2 (fratello: leucemia)	01/06/2005: MLSD diagnostica (carcinoma epidermoide) (c/o Oristano)	0	01/06/2005: prelievo bioptico in MLSD – carcinoma epidermoide (c/o Oristano)	0		5ab	0	R. Puxeddu	13	7	2005	2005.53	52.5724	1	2	0	0	3	0			15	3	2013	2013.21	NED
163	CS	1052/2005	XXXX	2	10	1950	1950.75	55	0	0	1	0	13	7	2005	2005.53	54.7801	2			Ipertensione arteriosa in trattamento, ipercolesterolemia in trattamento	0	0	0	0	0		1	0	R. Puxeddu	13	7	2005	2005.53	54.7801	1	4	1	1	2	0			21	3	2008	2008.22	NED
164	AF	114/2006	XXXX	19	8	1942	1942.63	62	0	1	1	0	13	7	2005	2005.53	62.9002	2			Polipectomia nasale disostruttiva (1998), ipertensione arteriosa (2001), psoriasi	2 (padre: Ca esofago)	0	0	0	0		3	0	R. Puxeddu	13	7	2005	2005.53	62.9002	1	4	0	0	2	0			10	10	2011	2011.77	NED
165	DS	791/2005	XXXX	15	3	1939	1939.21	66	0	1	1	0	25	7	2005	2005.57	66.3607	0	1	0	Angioplastica percutanea per AOAI (1997), ipertensione arteriosa in trattamento, ipercolesterolemia	0	0	0	0	0		5a	0	R. Puxeddu	25	7	2005	2005.57	66.3607	1	4	1	2	2	0			18	7	2011	2011.55	NED
166	MG	1110/2005	XXXX	12	12	1916	1916.95	88	0	1	1	0	25	10	2005	2005.82	88.8689	2			Chirurgia ernia strozzata (1990)	2 (sorella: Ca mammella)	0	0	0	0		5abc	0	R. Puxeddu	25	10	2005	2005.82	88.8689	3	2	0	0	4	0			1	10	2013	2013.75	NED
167	PAE	1121/2005	XXXX	28	11	1937	1937.91	67	0	1	0	0	27	10	2005	2005.82	67.9139	0	0	0	Flutter atriale persistente (2004)	0	0	0	0	0		2	0	R. Puxeddu	27	10	2005	2005.82	67.9139	0	4	0	0	2	0			31	8	2015	2015.67	NED
168	PS	1182/2005	XXXX	24	5	1921	1921.4	84	0	1	0	0	14	11	2005	2005.87	84.4726	0	0	1	Malaria (1936), cataratta bilaterale (2001), ernia jatale (2005)	0	0	0	0	0		5a	0	R. Puxeddu	14	11	2005	2005.87	84.4726	2	2	1	2	3	0			21	9	2010	2010.72	NED
169	BS	1276/2005	XXXX	25	1	1936	1936.07	69	0	0	1	0	7	12	2005	2005.93	69.8674	0	0	0	Chirurgia ernia discale (2000), litotrissia per nefrolitiasi (2004, 2005), ipertensione arteriosa in trattamento, DMII	2 (madre: Ca mammella)	0	0	22/11/2005: prelievo bioptico in MLSD – cheratosi laringea con focale e lieve displasia (c/o altra struttura)	0		4	0	R. Puxeddu	7	12	2005	2005.93	69.8674	1	2	0	0	2	0			1	11	2006	2006.83	DOC
170	AG	1340/2005	XXXX	21	2	1936	1936.14	69	0	1	0	0	21	12	2005	2005.97	69.8333	0	0	0	Chirurgia tiroide (1958)	0	0	0	28/11/2005: prelievo bioptico in MLSD – carcinoma squamocellulare cheratinizzante, invasivo	0		5ab	0	R. Puxeddu	21	12	2005	2005.97	69.8333	2	1	1	1	2	0			24	2	2012	2012.15	NED
171	MS	125/2010	XXXX	12	6	1952	1952.45	53	0	1	1	0	22	12	2005	2005.97	53.5274	0	3	1	Exeresi carcinoma basocellulare occhio dx (2001), appendicectomia (2002), sindrome da malassorbimento (2002)	0	0	0	0	0		4	0	R. Puxeddu	22	12	2005	2005.97	53.5274	1	4	0	0	3	0			1	10	2013	2013.75	LT
172	CA	28/2006	XXXX	20	3	1929	1929.22	76	0	1	1	0	11	1	2006	2006.03	76.8087	2			Chirurgia occlusione intestinale (1993)	0	0	0	0	0		2	0	R. Puxeddu	11	1	2006	2006.03	76.8087	1	4	0	0	5	0			15	3	2013	2013.21	NED
173	AS	1212/2010	XXXX	23	10	1948	1948.81	62	0	1	0	0	9	11	2010	2010.86	62.045	3	0	0	3 bypass aorto-coronarici (2001), disturbo bipolare in trattamento (2002), stent coronarico (2006), ipercolesterolemia (2006), BPCO in trattamento (2007), endoarteriectomia ICA (2010)	2 (madre: neoplasia SNC)	0	0	02/11/2010: prelievo bioptico in MLSD – carcinoma squamocellulare	0		5a	0	R. Puxeddu	9	11	2010	2010.86	62.045	1	1	1	2	2	0			12	4	2013	2013.28	NED
174	EE	1155/2010	XXXX	3	7	1939	1939.51	71	0	1	1	0	6	12	2010	2010.93	71.4249	0	0	0	Gastrectomia subtotale per ulcera peptica (1965), ictus cerebri (2000)	2 (fratello: Ca imprecisato)	0	0	22/11/2010: prelievo bioptico in MLSD – carcinoma squamocellulare	0		3	0	R. Puxeddu	6	12	2010	2010.93	71.4249	1	1	0	0	2	0			26	9	2013	2013.74	NED
175	BL	1215/2010	XXXX	12	6	1949	1949.45	61	0	1	1	0	21	12	2010	2010.97	61.5247	2	1	0	Appendicectomia (1969), ernioplastica inguinale dx (2000)	2 (padre: Ca polmone)	0	0	18/11/2010: prelievo bioptico in MLSD – carcinoma squamocellulare	0		5a	0	R. Puxeddu	21	12	2010	2010.97	61.5247	2	2	1	1	2	0			1	3	2011	2011.17	NED
176	DGA	74/2011	XXXX	24	9	1939	1939.73	71	0	1	0	0	21	1	2011	2011.05	71.3251	0	0	0	Chirurgia fistola perianale (1959), exeresi neoformazione polipoide vescica (2005), DMII in trattamento (2006)	2 (madre: neoplasia SNC)	0	0	0	0		3	0	R. Puxeddu	21	1	2011	2011.05	71.3251	1	4	0	0	2	0			27	9	2012	2012.74	NED
177	AM	104/2011	XXXX	20	2	1927	1927.14	84	0	1	1	0	1	2	2011	2011.08	83.9479	2			Ernioplastica inguinale sx (1985), chirurgia stenosi collo vescicale (1985), chirurgia ragadi anali (1990), chirurgia IPB (2005)	2 (padre: Ca cavo orale)	0	0	0	0		3	0	R. Puxeddu	1	2	2011	2011.08	83.9479	1	4	0	0	2	0			5	5	2012	2012.34	NED
178	PA	151/2011	XXXX	22	12	1949	1949.97	61	0	1	1	1	11	2	2011	2011.11	61.1365	0	0	1	MRGE (1985)	2 (padre: Ca cavo orale; fratello: Ca osso)	0	0	0	0		5a	0	R. Puxeddu	11	2	2011	2011.11	61.1365	2	4	1	2	1	0			17	9	2013	2013.71	NED
179	SC	90/2012	XXXX	4	11	1949	1949.84	61	0	1	1	0	4	4	2011	2011.26	61.4167	2			0	2 (fratello: Ca fegato)	0	0	11/03/2011: prelievo bioptico in MLSD – carcinoma squamocellulare	0		3	0	R. Puxeddu	4	4	2011	2011.26	61.4167	1	1	1	2	2	0			19	9	2013	2013.72	REC
180	MG	612/2011	XXXX	24	9	1942	1942.73	68	0	1	1	0	2	5	2011	2011.34	68.6064	2			0	0	0	0	0	0		3	0	R. Puxeddu	2	5	2011	2011.34	68.6064	1	4	0	0	3	0			13	9	2012	2012.7	NED
181	CS	1017/2011	XXXX	13	9	1935	1935.7	76	0	1	1	0	20	5	2011	2011.39	75.6858	2			Polipectomia endoscopica colon (2003), diverticolosi colon (2003), ipertensione arteriosa in trattamento (2008)	0	0	0	29/04/2011: prelievo bioptico in MLSD – carcinoma squamocellulare	0		5ad	0	R. Puxeddu	20	5	2011	2011.39	75.6858	2	1	1	2	3	0			7	5	2013	2013.35	NED
182	PP	563/2011	XXXX	22	1	1931	1931.06	80	0	1	1	1	24	5	2011	2011.4	80.3388	2			MRGE in trattamento (1980), chirurgia prostata (2000), colecistectomia (2009)	0	0	0		0		2	0	R. Puxeddu	24	5	2011	2011.4	80.3388	1	1	0	0	2	0			15	7	2013	2013.54	NED
183	CC	1138/2011	XXXX	25	2	1949	1949.15	62	0	1	0	0	14	6	2011	2011.45	62.3032	0	0	1	IPB (1999), DMII (2008), FA sottoposta a cardioversione (2008), emorroidectomia (2010)	0	0	0	0	0		6	0	R. Puxeddu	14	6	2011	2011.45	62.3032	3	4	1	2	1	0			28	9	2013	2013.74	NED
184	FL	654/2011	XXXX	24	2	1957	1957.15	54	0	1	1	1	8	7	2011	2011.52	54.3728	3	3	1	Broncopolmonite (1983), esofagite grado B e gastrite HP- correlata (2011)	0	0	0	0	0		5a	0	R. Puxeddu	8	7	2011	2011.52	54.3728	3	1	1	1	2	0			15	6	2012	2012.46	DOC
185	SA	706/2011	XXXX	5	7	1962	1962.51	49	0	1	0	1	21	7	2011	2011.55	49.0438	2	0	1	Appendicectomia (1970), chirurgia per ragade anale (2000), MLSD diagnostica per carcinoma spinocellulare corda vocale dx (2011), MRGE in seguito a EGDS	0	0	0	maggio 2011: biopsia incisionale c/o altra struttura	0		5ad	0	R. Puxeddu	21	7	2011	2011.55	49.0438	3	1	1	1	2	0			21	9	2014	2014.72	NED
186	SE	734/2011	XXXX	8	3	1961	1961.19	50	0	1	0	0	27	7	2011	2011.57	50.3854	0	0	0	Frattura Le Fort III (1982), ipoacusia neurosensoriale bilaterale (1987), appendicectomia (2009)	0	0	0	0	0		2	0	R. Puxeddu	27	7	2011	2011.57	50.3854	1	4	0	0	0	0			15	7	2013	2013.54	NED
187	LG	982/2011	XXXX	30	1	1930	1930.08	81	0	1	1	0	25	8	2011	2011.65	81.5696	2			Resezione gastro-duodenale per ulcera (1972), appendicectomia (1973), artrosi (1980), safenectomia (1990), ipertensione arteriosa in trattamento (2008), trombosi artero-venosa retinica occhio sx e chirurgia cataratta bilaterale (2009)	0	0	0	0	0		3	0	R. Puxeddu	25	8	2011	2011.65	81.5696	1	1	1	2	1	0			1	10	2013	2013.75	NED
188	SG	816/2011	XXXX	29	6	1939	1939.49	72	0	1	0	0	31	8	2011	2011.67	72.1721	2	0	0	FA (1994), frenuloplastica (2000), DMII in trattamento (2001) ipertensione arteriosa in trattamento (2007)	2 (madre: Ca colon; fratello: leucemia; fratello: Ca fegato; sorella: Ca mammella)	0	0	0	0		2	0	R. Puxeddu	31	8	2011	2011.67	72.1721	1	1	0	0	2	0			1	10	2013	2013.75	NED
189	CS	824/2011	XXXX	28	9	1950	1950.74	60	0	1	1	1	2	9	2011	2011.67	60.9288	2	?	?	Calo visus occhio sx da corpo estraneo (1956), stato neurovegetativo per tre settimane, splenectomia e osteomielite in seguito a incidente stradale (1981). TVP MI dx in trattamento (1982), ipertensione arteriosa in trattamento (2007), MRGE e ernia iatale in trattamento (2010)	0	0	0	27/06/2011: prelievo bioptico in MLSD – carcinoma spinocellulare infiltrante ulcerato (c/o altra struttura)	0		2	0	R. Puxeddu	2	9	2011	2011.67	60.9288	1	1	0	0	1	0			2	10	2013	2013.75	REC
190	SP	1050/2011	XXXX	13	11	1964	1964.87	47	0	1	1	0	12	9	2011	2011.7	46.8306	2			Exeresi cisti guancia sx (2007), exeresi cisti scroto (2010)	0	0	0	0	0		2	0	R. Puxeddu	12	9	2011	2011.7	46.8306	1	4	0	0	0	0			1	10	2013	2013.75	NED
191	MPG	983/2011	XXXX	16	2	1940	1940.12	71	0	1	1	0	26	10	2011	2011.82	71.6941	2			Ernioplastica inguinale dx (1991), ipertensione arteriosa (1997), ipercolesterolemia (1997), RCU (2005), perforazione coperta colon dx (2005), TIA (2005), endoarteriectomia carotide sx (2006),		0	0	02/09/2011: prelievo bioptico in MLSD - carcinoma squamocellulare (G3)	0		5acd dx	1	R. Puxeddu	26	10	2011	2011.82	71.6941	3	3	1	2	2	0			31	7	2013	2013.58	NED
192	SI	1019/2011	XXXX	29	7	1957	1957.58	54	0	1	1	0	10	11	2011	2011.86	54.2813	2			Ricovero per ascesso ghiandola sottomandibolare dx (2010)	2 (sorella: Ca imprecisato)	0	0	20/09/2011: prelievo bioptico in MLSD - carcinoma spinocellulare (c/o altra struttura)	0		5ad	0	R. Puxeddu	10	11	2011	2011.86	54.2813	3	1	1	2	1	0			11	6	2013	2013.44	NED
193	MM	1090/2011	XXXX	11	10	1947	1947.78	64	0	1	1	0	30	11	2011	2011.91	64.1354	2			ipertensione arteriosa in trattamento (1994), BPCO (2002), gotta in trattamento (2004)	0	0	0	0	0		3	0	R. Puxeddu	30	11	2011	2011.91	64.1354	1	4	0	0	1	0			14	9	2013	2013.7	NED
194	TP	1133/2011	XXXX	31	10	1959	1959.83	52	0	1	0	0	16	12	2011	2011.96	52.1256	1	0	0	Broncopolmonite (1990), HCV	2 (fratello: Ca imprecisato)	0	0	16/11/2011 prelievo bioptico in MLSD corda vocale dx - carcinoma squamocellulare (c/o altra struttura)	0		3ac	0	R. Puxeddu	16	12	2011	2011.96	52.1256	1	4	1	2	0	0			4	10	2013	2013.76	NED
195	DA	23/2012	XXXX	19	5	1945	1945.38	66	0	1	0	0	11	1	2012	2012.03	66.6447	1	0	1	Ipoacusia bilaterale in seguito a otite (1965), chirurgia cataratta occhio sx (2011)	0	0	0	0	0		2	0	R. Puxeddu	11	1	2012	2012.03	66.6447	1	2	0	0	0	0			9	10	2014	2014.77	NED
196	PDS	202/2012	XXXX	22	11	1965	1965.89	46	0	1	1	0	9	3	2012	2012.19	46.2977	1	0	1	Fistola sacro-coccigea (1987), peritonite (1996), diverticolite (2008), perforazione intestinale da conscopia per biopsia polipi (2009), sindrome ansiosa depressiva (2010), etilismo (2010) epatite alcolica (2013)	2 (padre: Ca imprecisato)	0	0	20/02/2012: prelievo bioptico in MLSD – carcinoma squamocellulare	0		2	0	R. Puxeddu	9	3	2012	2012.19	46.2977	1	1	0	0	0	0			14	2	2017	2017.12	NED
197	FP	450/2012	XXXX	28	6	1941	1941.49	70	0	1	1	0	31	5	2012	2012.42	70.9249	0	1	1	Appendicectomia (1964), tonsillectomia (1965), vagotomia per ulcera duodenale (1965), HCV (1975), ipertensione arteriosa in trattamento (1990), chirurgia cataratta (2007)	0	0	0	0	0		2	0	R. Puxeddu	31	5	2012	2012.42	70.9249	1	4	0	0	1	0			15	8	2013	2013.62	NED
198	CA	573/2012	XXXX	13	7	1940	1940.53	71	0	1	0	0	5	7	2012	2012.51	71.9781	2			IMA (2001), ipertensione arteriosa in trattamento (2001), ipercolesterolemia in trattamento (2001)	2 (fratello: Ca laringe; fratello: leucemia)	0	0	0	0		2	0	R. Puxeddu	5	7	2012	2012.51	71.9781	1	1	0	0	2	0			5	9	2014	2014.68	NED
199	CV	581/2012	XXXX	12	10	1960	1960.78	51	0	1	1	1	9	7	2012	2012.52	51.7418	2	1	1	Ipertensione arteriosa in trattamento (2005), MRGE (2012)	0	0	0	04/06/2012: prelievo bioptico in MLSD – carcinoma squamocellulare cheratoblastico, infiltrante, G1 (c/o Nuoro)	0		5a	0	R. Puxeddu	9	7	2012	2012.52	51.7418	2	1	1	3	2	0			15	8	2013	2013.62	NED
200	PA		XXXX	1	1	1950	1950		0	1	0		5	7	2012	2012.51	62.511	2										3	0		9	7	2012	2012.52	62.5219	1	2	0	0					9	5	2014	2014.36	NED
201	EGM	580/2012	XXXX	26	11	1935	1935.9	76	0	1	1	1	9	7	2012	2012.52	76.6201	0	0	1	Tonsillectomia (1943), TBC ossea (1969), ipertensione arteriosa in trattamento (1990), gozzo multinodulare tossico (2004), adenocarcinoma prostatico in trattamento (2010), chirurgia cataratta occhio dx (2010), MRGE (2011)	1 (Ca prostata, 2010)	0	0	17/05/2012: prelievo bioptico in MLSD – carcinoma squamocellulare, G1 (c/o Nuoro)	0		5ad	0	R. Puxeddu	9	7	2012	2012.52	76.6201	3	2	1	1	2	0			1	10	2013	2013.75	NED
202	MI	582/2012	XXXX	23	5	1964	1964.39	48	0	1	1	0	9	7	2012	2012.52	48.1283	2	0	0	Chirurgia ernia discale (1996, 2003), emorroidectomia (2001), stapedotomia dx (2008)	0	0	0	0	2		2	0	R. Puxeddu	9	7	2012	2012.52	48.1283	1	4	0	0	2	0			13	10	2016	2016.78	NED
203	FG		XXXX	1	1	1950	1950		0	1	0		19	7	2012	2012.55	62.5493	2										3	0	R. Puxeddu	1	7	2012	2012.5	62.5	1	1	0	0					15	1	2016	2016.04	NED
204	LC	515/2012	XXXX	28	10	1944	1944.82	67	0	1	1	0	21	6	2012	2012.47	67.6475	0	1	0	Cardiopatia ischemica; Ipertensione arteriosa	0	0	0	1 (maggio 2012 c.o Altra S)	0		5ad	0	R. Puxeddu	21	7	2012	2012.55	67.7308	3	1	1	1	3	0			15	7	2013	2013.54	NED
205	MG	928/2012	XXXX	17	12	1953	1953.96	58	0	0	1	0	31	8	2012	2012.67	58.705	0	1	0	Appendicectomia	2	0	0	0	0		5ac	0	R. Puxeddu	31	8	2012	2012.67	58.705	1	2	1	1	3	0			12	7	2016	2016.53	NED
206	MP	850/2012	XXXX	3	12	1950	1950.92	61	0	1	1	0	2	10	2012	2012.75	61.8306	2			Diabete mellito tipo II, Ipertensione arteriosa, insufficienza aortica moderata	2	0	0	0	0		1	0	R. Puxeddu	2	10	2012	2012.75	61.8306	1	1	0	0	1	0			21	2	2017	2017.14	NED
207	LL	995/2012	XXXX	14	12	1951	1951.95	60	0	1	0	0	12	10	2012	2012.78	60.8279	1	0	0	Carcinoma cavo orale operato il 28.6.11	1	0	0	1 (11.5.2012)	0		3	0	R. Puxeddu	12	10	2012	2012.78	60.8279	1	1	0	0	1	0			13	1	2017	2017.03	NED
208	AA	1003/2012	XXXX	19	6	1953	1953.47	59	1	0	0	0	20	11	2012	2012.89	59.4194	0	0		Ernia iatale;	0	1	0	0	0		1	0	R. Puxeddu	20	11	2012	2012.89	59.4194	0	1	0	0	1	0			11	7	2013	2013.53	NED
209	UE	761/2013	XXXX	13	7	1944	1944.53	68	0	1	1		21	11	2012	2012.89	68.3553	1		1	Ipertensione arteriosa		0	0	0			5abcd	1	R. Puxeddu	21	11	2012	2012.89	68.3553	3	2	1	1					20	8	2013	2013.64	NED
210	TL	1086/2012	XXXX	7	4	1983	1983.27	29	1	1	1	0	14	12	2012	2012.95	29.6858	2	0		Papilloma cervicale	0	0	0	0	0		1	0	R. Puxeddu	14	12	2012	2012.95	29.6858	0	1	0	0	1	0			15	11	2016	2016.87	NED
211	PR	1102/2012	XXXX	18	5	1938	1938.38	74	0	1	1	1	27	12	2012	2012.99	74.608	2			Alterata glicemia a digiuno, MRGE,glaucoma bilaterale	2 (madre: carcinoma parotideo, fratello: carcinoma polmonare	0	0	0	0		3a	0	R. Puxeddu	27	12	2012	2012.99	74.608	1	2	1	2	1	0			18	11	2016	2016.88	NED
212	MT	31/2013	XXXX	27	2	1944	1944.15	68	0	0	0	0	9	1	2013	2013.02	68.8674	0	0	0	Infezione da HCV, ipertensione arteriosa	2 (sorella: carcinoma mammario fratello: leucemia)	0	0	0	0		3	0	R. Puxeddu	9	1	2013	2013.02	68.8674	2	1	0	0	2	0			25	7	2013	2013.57	NED
213	CF	173/2013	XXXX	26	3	1950	1950.24	62	0	1	0	0	25	2	2013	2013.15	62.9139	1	0	0	IPB, ipercolesterolemia	2 (madre: carcinoma linguale	Ottobre 2012-biopsia laringea in MLSD presso altra struttura: displasia moderata	0	0	0		5ad	0	R. Puxeddu	25	2	2013	2013.15	62.9139	1	1	1	2	2	0			23	12	2014	2014.98	NED
214	PS	258/2013	XXXX	30	1	1943	1943.08	70	0	0	1	0	19	3	2013	2013.22	70.1365	0			Calcolosi renale, ipertensione arteriosa, ipercolesterolemia	2 (fratello: epatocarcinoma)	0	0	0	0		1	0	R. Puxeddu	19	3	2013	2013.22	70.1365	1	1	0	0	2				4	10	2013	2013.76	NED
215	PG	276/2013	XXXX	15	1	1939	1939.04	74	0	1	1	0	25	3	2013	2013.23	74.1941	0	1	1	IPB, ipertensione arteriosa	0	0	0	25/02/2013: biopsia della corda vocale sinistra con diagnosi di carcinoma	0		3	0	R. Puxeddu	25	3	2013	2013.23	74.1941	1	1	0	0	1	0			7	7	2016	2016.52	NED
216	CI	295/2013	XXXX	22	3	1968	1968.22	45	0	1	1	0	28	3	2013	2013.24	45.0164	0	1	0	0	2 (padre: leucemia)	0	0	0	0		2	0	R. Puxeddu	28	3	2013	2013.24	45.0164	2	2	1	2	1	0			20	9	2013	2013.72	NED
217	DS	300/2013	XXXX	1	1	1960	1960		0	1	0		1	1	2013	2013	53	2										3	0	R. Puxeddu	1	4	2013	2013.25	53.25	1	1	0	0					1	5	2013	2013.33	NED
218	EO	414/2013	XXXX	26	5	1958	1958.4	54	0	0	0	0	9	4	2013	2013.27	54.8701	0	0	0	2010: exeresi di carcinoma del canto oculare esterno esterno	1	0	0	1 (27/03/2013)	1		5abcd	1	R. Puxeddu	9	4	2013	2013.27	54.8701	3	1	1	2	4				8	11	2016	2016.85	NED
219	PMV	553/2013	XXXX	20	6	1954	1954.47	58	0	0	1	0	10	6	2013	2013.44	58.9726	0	1	0	Ipertensione arteriosa, diabete di tipo II, gozzo multinodulare in eutiroidismo, poliposi naso-sinusale sottoposto a FESS (2013)	0	0	0	1 (03/06/2013)	1		3	0	R. Puxeddu	3	6	2013	2013.42	58.9534	1	2	1	2	2	0	0		28	2	2017	2017.16	NED
220	SMAA	650/2013	XXXX	30	11	1950	1950.91	62	0	1	1	0	4	7	2013	2013.51	62.5954	0	0	1	0	0	0	0	0	2		3a	0	R. Puxeddu	4	7	2013	2013.51	62.5954	1	1	1	1	3	0	0		3	6	2014	2014.42	NED
221	MA	713/2013	XXXX	15	6	1950	1950.46	63	0	0	1	0	22	7	2013	2013.56	63.1025	0	1	0	Ipertensione arteriosa	0	0	0	0	2		5ac	0	R. Puxeddu	22	7	2013	2013.56	63.1025	1	1	0	0	3	0	0		3	11	2016	2016.84	NED
222	PE	815/2013	XXXX	1	4	1938	1938.25	75	0	1	1	0	22	8	2013	2013.64	75.3909	0		0	Ipertensione arteriosa, cardiopatia ischemica; ernioplastica inguinale dx.	0	0	0	0	1		5a dx	0	R. Puxeddu	22	8	2013	2013.64	75.3909	1	1	0	0	3	0			27	3	2014	2014.24	NED
223	MP	829/2013	XXXX	28	3	1954	1954.24	59	0	1	1	0	29	7	2013	2013.58	59.3361	0	1	1	Calcolosi renale; TURP per IPB	0	0	0	1 (21/06/2013 c/o altra struttura) diagnosi: carcinoma spinocellulare non cheratoblastico ulcerato	1		5a dx	0	R. Puxeddu	29	7	2013	2013.58	59.3361	3	2	1	2	1	0	0		10	1	2017	2017.02	NED
224	ZF	872/2013	XXXX	25	3	1942	1942.23	70	0	1	1	0	10	9	2013	2013.69	71.4589	0	1	0	Diabete di tipo II, BPCO, glaucoma bilaterale, ipertensione arteriosa, cardiopatia ischemica con posizionamento di stents coronarici	0	0	0	0	1		5abcd dx	1	R. Puxeddu	10	9	2013	2013.69	71.4589	3	2	1	3	2	0	0		13	3	2014	2014.2	DOC
225	RSG	942/2013	XXXX	17	3	1957	1957.21	56	0	1	1	0	30	9	2013	2013.75	56.5356	0	1	0	Ipertensione arteriosa	2 (madre: neoplasia intestinale; sorella: ca mammario)	0	0	1 (10/09/2013) prelievo bioptico: carcinoma squamocellulare	1		5bc dx	0	R. Puxeddu	30	9	2013	2013.75	56.5356	3	1	0	0	3	0	0		18	1	2016	2016.05	NED
226	LG	1090/2013	XXXX	15	4	1936	1936.29	77	0	1	1	0	11	11	2013	2013.86	77.5724	0	2	0	Ipertensione arteriosa, BPCO, diabete di tipo II, F.A, I.R.C, ipercolesterolemia.	0	0	0	1 (11/10/2013) prelievo bioptico: carcinoma squamocellulare con aree di sdifferenzizione a cellule fusate ad alto indice mitotico	2		5ac sn	0	R. Puxeddu	11	11	2013	2013.86	77.5724	2	2	1	1	3	0	0		25	2	2014	2014.15	NED
227	UM	1105/2013	XXXX	18	4	1957	1957.3	56	0	1	1	0	13	11	2013	2013.87	56.5696	1	1	0	Disturbo bipolare	2 (sorella: carcinoma mammario)	0	0	0	2		2 sn	0	R. Puxeddu	13	11	2013	2013.87	56.5696	1	1	0	0	2	0	0		1	9	2016	2016.67	NED
228	CG	1146/2013	XXXX	16	4	1938	1938.29	75	0	1	1	0	25	11	2013	2013.9	75.608	0	1	1	Glaucoma, ipertensione arteriosa, F.A	2 (sorella: carcinoma uterino)	0	0	0	1		2 dx	0	R. Puxeddu	25	11	2013	2013.9	75.608	1	2	0	0	3	0	0		31	1	2017	2017.08	NED
229	VC	1237/2013	XXXX	30	4	1929	1929.33	84	1	0	1	1	18	12	2013	2013.96	84.6338	0	0	1	Ipertensione arteriosa, ipercolesterolemia, cardiopatia ischemica, insufficienza venosa cronica	0	0	0	0	1		4 dx	0	Dott. Aste	18	12	2013	2013.96	84.6338	1	1	0	0	3	0	0		5	9	2015	2015.68	NED
230	SA	48/2014	XXXX	20	9	1943	1943.72	70	0	1	1	1	16	1	2014	2014.04	70.3224	1	1	1	Ipertensione arteriosa; Stenosi aortica sottoposta a sostituzione valvolare; Ernia iatale	0	0	0	0	1		3ac dx	0	Prof. Puxeddu	16	1	2014	2014.04	70.3224	1	1	1	2	1	0	0		24	2	2017	2017.15	NED
231	PB	347/2015	XXXX	8	12	1949	1949.94		0	1	1	0	20	1	2014	2014.05	64.1162	0	1	0	Ipertensione arteriosa; Diabete Mellito tipo II	2 (padre:carcinoma del polmone; sorella: neoplasia del fegato; fratello: neoplasia del polmone; fratello: neoplasia non meglio precisata)	0	0	0	1		5ac dx	0	Prof. Puxeddu	20	1	2014	2014.05	64.1162	3	2	1	3	2	0			29	11	2016	2016.91	LT
232	ZB		XXXX	1	1	1950	1950		0	1	0		31	1	2014	2014.08	64.0822	2										3	0	R. Puxeddu	1	2	2014	2014.08	64.0822	1	2	1	1					10	5	2016	2016.36	NED
233	FA	155/2014	XXXX	10	11	1946	1946.86		0	1	1	1	6	2	2014	2014.1	67.239	0	1	1	Esofagite di Barret; IPB; Ipertensione Arteriosa	2		0	0	2		2 sn	0	R. Puxeddu	6	2	2014	2014.1	67.239	1	1	0	0		0	0		27	1	2017	2017.07	NED
234	CG	179/2014	XXXX	29	4	1938	1938.33		0	1	0	0	12	2	2014	2014.11	75.7868	0	0	0	Ipertensioene Arteriosa; Poliposi vescicale; Anemia Emolitica Autoimmune; Coliche Renali;	1	0	0	0	1		2 dx	0	R. Puxeddu	12	2	2014	2014.11	75.7868	1	1	0	0		0	0		20	1	2017	2017.05	NED
235	RM	252/2014	XXXX	8	5	1940	1940.35		0	1	1	1	5	3	2014	2014.18	73.8251	0	1	1	Artrosi cervicale; Ernia jatale da scivolamento e gastroduodenite erosiva in terapia farmacologica; Ipertensione arteriosa in terapia farmacologica; IPB in terapia farmacologica	0	0	0	1 (Displasia di grando indeterminato dell'epitelio superficiale di rivestimento ed essudazione linfomonocitaria del corion; l'esiguità dei prelievi e i diffusi artefatti non consentono di esprimere un più preciso giudizio diagnostico)	2		1 sn	0	Prof. Puxeddu	5	3	2014	2014.18	73.8251	1	4	0	0	6	3	33 sedute		2	3	2017	2017.17	RT
236	VA	273/2014	XXXX	12	9	1937	1937.7		0	1	1	0	12	3	2014	2014.2	76.5	0	1	0	Ipertensione arteriosa; Cardiopatia ischemica	0	0	0	0	1		5ac dx	0	Prof. Puxeddu	12	3	2014	2014.2	76.5	2	1	1	1	2	0	0		8	9	2016	2016.69	NED
237	CL	256/2015	XXXX	28	1	1955	1955.07		0	1	1	0	17	3	2014	2014.21	59.1365	3	3	0	Vitiligine; Ipertensione arteriosa; BPCO; Cisti renali bilaterali; Etilismo cronico con epatopatia cronica; IPB	1 (Carcinoma tiroideo)	0	0	0	1		5abcd dx	1	Prof. Puxeddu	17	3	2014	2014.21	59.1365	3	4	1	3	3	0	0		17	2	2017	2017.13	NED
238	PG	365/2014	XXXX	28	4	1947	1947.32		0	1	1	0	2	4	2014	2014.25	66.9288	0	0	0	0	1 (Carcinoma del margine linguale destro sottoposto a emipelviglossectomia destra conservativa, svuotamento linfonodale l-c dx (livelli I – IV), ricostruzione con lembo libero rivascolarizzato antibrachiale sn e tracheotomia)	1 (3/10/2012: Cordectomia tipo V a allargata alla commissura anteriore – ISTOLOGICO??)	0	0	1+2		2 sn	0	Prof. Puxeddu	2	4	2014	2014.25	66.9288	1	1	0	0		0	0		31	1	2017	2017.08	NED
239	DTP	570/2014	XXXX	10	12	1935	1935.94		0	1	0	0	15	4	2014	2014.29	78.347	0	0	0	Neoplasia polmonare in attesa di intervento chirurgico; Osteoartrosi;	1	1994: c/o SS Trinità	0	o	2		2 sn	0	R. Puxeddu	15	4	2014	2014.29	78.347	2	1	1	3		0	0		15	11	2016	2016.87	NED
240	RL	739/2014	XXXX	23	10	1929	1929.81		1	1	1	1	9	7	2014	2014.52	84.7116	2			Coxartrosi deformante anca dx con osteonecrosi; Scompenso cardiaco cronico classe IV NYHA secondario a disfunzione biventricolare e insufficienza mitralica severa con aritmia da FA ricorrente e cardiopatia ipertensiva; Impianto di defibrillatore endocavitario in prevenzione secondaria per aritmie ventricolari maggiori; Insufficienza venosa cronica arti inferiori; Osteoporosi severa diffusa; Iperu…	2 (Madre: Leucemia fulminante)	0	0	0	1		5abcd dx	1	R. Puxeddu	9	7	2014	2014.52	84.7116	3	1	1	2	11	0	0		15	10	2016	2016.79	NED
241	LA	751/2014	XXXX	27	9	1965	1965.74		0	1	0		11	7	2014	2014.53	48.7895	2										3	0	R. Puxeddu	31	7	2014	2014.58	48.7895	1	2	0	0					1	3	2015	2015.17	NED
242	CV	927/2014	XXXX	14	7	1932	1932.54		0	1	1	1	1	9	2014	2014.67	82.1311	0	0	1	Ipertensione arteriosa; Diabete Mellito tipo II con retinopatia diabetica bilaterale	2 (Padre: Ca prostata)	2006: Biopsia corda vocale dx presso altro Presidio	0	0	1		2 dx	0	R. Puxeddu	1	9	2014	2014.67	82.1311	1	1	0	0	1	0	0		26	1	2017	2017.07	NED
243	CL	921/2014	XXXX	11	4	1936	1936.28		0	1	1	0	1	9	2014	2014.67	78.3893	0	0	1	IPB; Disturbo d'ansia; Aritmia cardiaca; OSAS; Ipertensione arteriosa; Gotta; BPCO	2 (sorella: Ca mammella)	0	0	0	1		3c dx	0	R. Puxeddu	1	9	2014	2014.67	78.3893	1	1	0	0	2	0	0		12	8	2016	2016.61	NED
244	MS	924/2014	XXXX	19	3	1977	1977.22		1	1	0		1	9	2014	2014.67	37.4507	2										3	0	R. Puxeddu	1	9	2014	2014.67	37.4507	1	1	0	0					15	2	2017	2017.12	NED
245	DS	1085/2015	XXXX	14	1	1952	1952.04	62	1	0	0	1	27	10	2014	2014.82	62.7856	0	0	1	Intolleranza flucidica in terapia dietetica; Ipercolesterolemia in terapia medica; Ipertensione arteriosa in terapia medica; Glaucoma bilaterale in terapia medica; Ernia jatale in terapia medica; Urolitiasi bilaterale	2 (Madre: Ca mammella)	0	0	0	2		5abcd	1	R. Puxeddu	27	10	2014	2014.82	62.7856	3	1	1	2	1	3			5	3	2017	2017.18	LT
246	BM	325/2015	XXXX	16	2	1963	1963.12		0	1	1	1	12	11	2014	2014.86	51.739	0	2	1	Tiroidite di Hashimoto; Ernia iatale; Urolitiasi bilaterale; G6PDH-carenza	0	0	0	0	1		5b dx	0	R. Puxeddu	12	11	2014	2014.86	51.739	1	4	0	0	1	0	0		6	2	2017	2017.1	LP
247	LM	566/2015	XXXX	14	2	1946	1946.12		0	1	1	1	12	11	2014	2014.86	68.7445	2			Artrite reumatoide	2 (Fratello: Ca esofageo)	0	0	0	1		2	0	R. Puxeddu	12	11	2014	2014.86	68.7445	2	4	1	1	1	0	0		10	1	2017	2017.02	REC
248	PR	764/2015	XXXX	10	4	1948	1948.27		0	1	1	0	24	11	2014	2014.9	66.6217	0	0	0	Diabete Mellito; Sindrome depressiva; Glaucoma	0	0	0	0	1+2		3	0	R. Puxeddu	24	11	2014	2014.9	66.6217	1	1	0	0	1	0	0		10	1	2017	2017.02	NED
249	AG	1331/2014	XXXX	7	5	1956	1956.35		0	1	1	0	10	12	2014	2014.94	58.5916	0	1	0	Litiasi renale; G6PDH-carenza	0	0	0	0	2		5ac	0	R. Puxeddu	10	12	2014	2014.94	58.5916	3	1	1	2	2	0	0		29	11	2016	2016.91	NED
250	PA	1390/2014	XXXX	23	9	1939	1939.73		0	1	1	1	29	12	2014	2014.99	75.2664	0	0	1	IPB; Esofagite da reflusso; Osteoartrosi diffusa	0	0	0	0	1		3	0	R. Puxeddu	29	12	2014	2014.99	75.2664	1	1	0	0	2	0	0		1	12	2016	2016.92	NED
251	FE	74/2015	XXXX	8	9	1930	1930.69		0	1	1	0	20	1	2015	2015.05	84.3662	0	0	0	Ipertensione arteriosa in terapia medica; Diabete Mellito tipo 2 in terapia con ipoglicemizzanto orali; Cardiopatia ischemico-ipertensiva; G6PDH-carenza; Allergia al Buscopan	1 (Carcinoma squamocellulare del labbro inferiore; Carcinoma prostatico-vescicale) + 2 (Fratello: Carcinoma polmonare; Fratello: Carcinoma epatico; Fratello: Carcinoma del colon)	0	0	1 (Displasia focalmente di alto grado)	2		2	0	R. Puxeddu	20	1	2015	2015.05	84.3662	2	1	1	2	5	0	0		1	1	2016	2016	DOC
252	AGC	751/2015	XXXX	14	7	1941	1941.54		0	1	0	0	29	4	2015	2015.33	73.7911	0	0	0	Ipertensione arteriosa in terapia farmacologica; Epatopatia HCV-relata post-trasfusionale; G6PDH-carenza	2 (Padre: Carcinoma polmonare; Sorella: Carcinoma pancreas; Sorella: Carcinoma mammario; Sorella: Carcinoma colon-retto; Fratello: Carcinoma renale e metastasi pancreatiche)	0	0	0	1		5abcd dx	1	R. Puxeddu	29	4	2015	2015.33	73.7911	3	2	1	3	5	0	0		1	12	2016	2016.92	NED
253	VMB	687 bis/2015 (MANCA CARTELLA)	XXXX	15	4	1958	1958.29		1	1	0		24	6	2015	2015.48	57.1913	3								1		2	0	R. Puxeddu	24	6	2015	2015.48	57.1913	1	1	1	2	2				22	12	2016	2016.97	NED
254	SG	787/2015	XXXX	1	4	1947	1947.25		0	1	1	0	17	7	2015	2015.54	68.2938	0	1	0	Trombocitemia; Cardiopatia ischemica (pregresso IMA trattato con bypass aorto-coronarico); Diabete Mellito tipo 2 in terapia medica; Allergia alla penicillina e punture d'insetti	1 (Adenocarcinoma colon-retto) + 2 (Madre: Carcinoma pancreas; Fratello: Carcinoma pancreas; Fratello: Neoplasia fegato; Fratello: Neoplasia prostata)	0	0	0	2		5ac sn	0	R. Puxeddu	17	7	2015	2015.54	68.2938	2	2	1	1	3	3	0		1	1	2017	2017	NODE
255	MA	856/2015	XXXX	20	9	1939	1939.72		0	1	1	0	4	8	2015	2015.59	75.8728	1	1	0	BPCO; diverticolosi colon	2 (sorella: carcinoma mammario)		0	0	2		3a	0	R. Puxeddu	4	8	2015	2015.59	68.2938	1	1	1	3	?	0	0		1	11	2016	2016.83	NED
256	AM	1171/2015	XXXX	23	6	1954	1954.48		0	1	0	1	19	10	2015	2015.8	61.3224	2	1	0	Tireopatia nodulare; diverticolosi colon	2 (Padre: Ca prostata; Sorella: carcinoma mammario)	0	0	0	2		6	0	R. Puxeddu	19	10	2015	2015.8	75.8728	1	1	1	2	?	0	0		1	11	2016	2016.83	NED
257	CM	1298/2012	XXXX	29	5	1958	1958.41		0	1	1	1	19	11	2015	2015.88	57.4726	2	1	0	Ipercolesterolemia; cardiopatia ischemica	2 (Madre: ca intestinale: Sorella: ca intestinale)	0	0	0	2		3 sn	0	R. Puxeddu	19	11	2015	2015.88	61.3224	1	1	0	0	?	0	0		3	2	2017	2017.09	NED
258	CR	1269/2015	XXXX	14	11	1968	1968.87		0	1	1	1	2	12	2015	2015.92	47.0505	0	1	1	Ipertensione arteriosa; RGE	2 (Madre: ca tiroide; Padre: ca gastrico)	0	0	0	1		5acd	1	R. Puxeddu	2	12	2015	2015.92	57.4726	3	2	1	2	5	1	33 sedute		15	1	2017	2017.04	RT
259	MA	1312/2015	XXXX	20	2	1949	1949.14		0	0	1	0	28	12	2015	2015.99	66.8553	2			Ipercolesterolemia; ipertensione arteriosa	0	0	0	0	1		3	0	R. Puxeddu	28	12	2015	2015.99	47.0505	1	1	1	3	2	0	0		7	2	2017	2017.1	NED
260	MG	108/2016	XXXX	14	6	1952	1952.45		0	0	1	0	15	2	2016	2016.12	63.6694	2			0	2 (Padre: ca rettale; Madre: ca epatico)	0	0	1 (03/12/2015 in MLSD laser c/o altro P.O. “carcinoma epidermoide moderatamente differenziato ulcerato e infiltrante lo stroma”)	1		5a	0	R. Puxeddu	15	2	2016	2016.12	66.8553	1	2	1	2	3	0	0		25	11	2016	2016.9	NED
261	SR	110/2016	XXXX	16	11	1953	1953.87		1	1	1	0	15	2	2016	2016.12	62.2473	2			Disturbo bipolare	2 (Padre: ca polmonare; sorella: ca pancreatico; sorella: ca mammario)	1 (21/12/2015 exeresi MLSD laser leucoplachia verrucoide c.v. Sn IST “iperplasia verrucosa”– R. Puxeddu)	0	0	1		3	0	R. Puxeddu	15	2	2016	2016.12	63.6694	2	1	0	0	2	0	0		15	2	2017	2017.12	NED

## Sheet: Foglio 2
meloni antonio	1064	2002
tamponi giovanni battista	1073
maddaluno giovanni	1131
pisano antonio	1163
sanna giovannino	1308
asili antonio	1427
serra umberto	1431
fanni virgilio	1621
abis battista	18	2003
serreli palmerio	26
salaris pietro	241
meloni salvatore	275	446	T1b AC2
mereu paolo	331
cadeddu giovanni	378
careddu ferdinando	480
mereu cosimo	646
demuro sandro		37792
mereu giorgio	806
piras rina	809
casula walter	927

## Sheet: Tabella KM spec dis surv
INTERVALLI	PAZIENTI A RISCHIO	FREE DISEASE SURV	CENSURATI	SOPRAVVIVENZA PERIODO = 1-EVENTI/Popolazione a rischio	SOPRAVVIVENZA CUMULATIVA
1=0-12	214		47	1	1
2=13-24	167		31	1	1
3=25-36	136	1	22	0.992647	0.992647
4=37-48	113		9	1	0.992647
5=49-60	104		20	1	0.992647
6=61-72	84		12	1	0.992647
7=73-84	72		19	1	0.992647
8=85-96	53		11	1	0.992647
9=97-108	42		10	1	0.992647
10=109-120	32		8	1	0.992647
FR=>120		1	23
			212
INTERVALLI	PAZIENTI A RISCHIO	FREE REC SURV	CENSURATI	SOPRAVVIVENZA PERIODO	SOPRAVVIVENZA CUMULATIVA
1=0-12	214	4	47	0.981308	0.981308
2=13-24	163	5	28	0.969325	0.951207
3=25-36	130	2	21	0.984615	0.936573
4=37-48	107		9	1	0.936573
5=49-60	98		18	1	0.936573
6=61-72	80	1	10	0.9875	0.924866
7=73-84	69		19	1	0.924866
8=85-96	50	1	9	0.98	0.906368
9=97-108	40		9	1	0.906368
10=109-120	31	1	7	0.967742	0.877131
FR=>120	23	0	23	1
		14	200
INTERVALLI	PAZIENTI A RISCHIO	OVERALL LARING PRES	CENSURATI	SOPRAVVIVENZA PERIODO	SOPRAVVIVENZA CUMULATIVA
1=0-12	214		47	1	1
2=13-24	167		31	1	1
3=25-36	136	2	22	0.985294	0.985294
4=37-48	112		9	1	0.985294
5=49-60	103		20	1	0.985294
6=61-72	83		12	1	0.985294
7=73-84	71		19	1	0.985294
8=85-96	52		10	1	0.985294
9=97-108	42		10	1	0.985294
10=109-120	32		8	1	0.985294
FR=>120	24	1	23
INTERVALLI	PAZIENTI A RISCHIO	OVERALL SURVIVAL	CENSURATI	SOPRAVVIVENZA PERIODO	SOPRAVVIVENZA CUMULATIVA
1=0-12	214	4	43	0.981308	0.981308
2=13-24	167	3	28	0.982036	0.96368
3=25-36	136	6	17	0.955882	0.921165
4=37-48	113	4	5	0.964602	0.888557
5=49-60	104	3	17	0.971154	0.862926
6=61-72	84	1	11	0.988095	0.852653
7=73-84	72		19	1	0.852653
8=85-96	53	2	9	0.962264	0.820477
9=97-108	42	1	9	0.97619	0.800942
10=109-120	32	4	4	0.875	0.700824
FR=>120	24	4	20
		32	182
INTERVALLI	PAZIENTI A RISCHIO	Overall laringeal laser pres	CENSURATI	SOPRAVVIVENZA PERIODO	SOPRAVVIVENZA CUMULATIVA
1=0-12	214	2	47	0.990654	0.990654
2=13-24	165	1	31	0.993939	0.98465
3=25-36	133	2	21	0.984962	0.969843
4=37-48	110		9	1	0.969843
5=49-60	101		19	1	0.969843
6=61-72	82		12	1	0.969843
7=73-84	70		19	1	0.969843
8=85-96	51		10	1	0.969843
9=97-108	41		9	1	0.969843
10=109-120	32		8	1	0.969843
FR=>120	24	1	23
			208
	INTERVALLI	PAZIENTI A RISCHIO	Overall survival T1	CENSURATI	SOPRAVVIVENZA PERIODO = 1-EVENTI/Popolazione a rischio	SOPRAVVIVENZA CUMULATIVA
	1=0-12	167	2	36	0.988024	0.988024
	2=13-24	129	3	25	0.976744	0.965047
	3=25-36	101	5	14	0.950495	0.917272
	4=37-48	82	2	3	0.97561	0.8949
	5=49-60	77	3	14	0.961039	0.860033
	6=61-72	60		9	1	0.860033
	7=73-84	51		14	1	0.860033
	8=85-96	37	1	8	0.972973	0.836789
	9=97-108	28		6	1	0.836789
	10=109-120	22	3	3	0.863636	0.722682
	FR=>120		2	14
				146
	INTERVALLI	PAZIENTI A RISCHIO	Disease fspecific free surv T1	CENSURATI	SOPRAVVIVENZA PERIODO = 1-EVENTI/Popolazione a rischio	SOPRAVVIVENZA CUMULATIVA
	1=0-12	167		38	1	1
	2=13-24	129		28	1	1
	3=25-36	101		19	1	1
	4=37-48	82		5	1	1
	5=49-60	77		17	1	1
	6=61-72	60		9	1	1
	7=73-84	51		14	1	1
	8=85-96	37		9	1	1
	9=97-108	28		6	1	1
	10=109-120	22		6	1	1
	FR=>120		1	15
	INTERVALLI	PAZIENTI A RISCHIO	Recurrence-free survival	CENSURATI	SOPRAVVIVENZA PERIODO = 1-EVENTI/Popolazione a rischio	SOPRAVVIVENZA CUMULATIVA
	1=0-12	167	4	38	0.976048	0.976048
	2=13-24	125	3	26	0.976	0.952623
	3=25-36	96	1	17	0.989583	0.9427
	4=37-48	78		5	1	0.9427
	5=49-60	73		15	1	0.9427
	6=61-72	58		9	1	0.9427
	7=73-84	49		14	1	0.9427
	8=85-96	35	1	7	0.971429	0.915765
	9=97-108	27		6	1	0.915765
	10=109-120	21	1	5	0.952381	0.872157
	FR=>120			15
	INTERVALLI	PAZIENTI A RISCHIO	Laser laryngeal preservation	CENSURATI	SOPRAVVIVENZA PERIODO = 1-EVENTI/Popolazione a rischio	SOPRAVVIVENZA CUMULATIVA
	1=0-12	167	1	38	0.994012	0.994012
	2=13-24	128	1	28	0.992188	0.986246
	3=25-36	99	1	18	0.989899	0.976284
	4=37-48	80		5	1	0.976284
	5=49-60	75		16	1	0.976284
	6=61-72	59		9	1	0.976284
	7=73-84	50		14	1	0.976284
	8=85-96	36		8	1	0.976284
	9=97-108	28		6	1	0.976284
	10=109-120	22		6	1	0.976284
	FR=>120		1	15
	INTERVALLI	PAZIENTI A RISCHIO	Overall laryngeal preservation	CENSURATI	SOPRAVVIVENZA PERIODO = 1-EVENTI/Popolazione a rischio	SOPRAVVIVENZA CUMULATIVA
	1=0-12	167		38	1	1
	2=13-24	129		28	1	1
	3=25-36	101	1	19	0.990099	0.990099
	4=37-48	81		5	1	0.990099
	5=49-60	76		17	1	0.990099
	6=61-72	59		9	1	0.990099
	7=73-84	50		14	1	0.990099
	8=85-96	36		8	1	0.990099
	9=97-108	28		6	1	0.990099
	10=109-120	22		6	1	0.990099
	FR=>120		1	1516
	INTERVALLI	PAZIENTI A RISCHIO	Recurrence free survival	CENSURATI	SOPRAVVIVENZA PERIODO = 1-EVENTI/Popolazione a rischio	SOPRAVVIVENZA CUMULATIVA
	1=0-12	24		4	1	1
	2=13-24	20	2	3	0.9	0.9
	3=25-36	15	1	2	0.933333	0.84
	4=37-48	12		1	1	0.84
	5=49-60	11		2	1	0.84
	6=61-72	9		1	1	0.84
	7=73-84	8		2	1	0.84
	8=85-96	6		2	1	0.84
	9=97-108	4		0	1	0.84
	10=109-120	4		2	1	0.84
	FR=>120			2
				21
	INTERVALLI	PAZIENTI A RISCHIO	Tis	CENSURATI	SOPRAVVIVENZA PERIODO = 1-EVENTI/Popolazione a rischio	SOPRAVVIVENZA CUMULATIVA
	1=0-12	23		5	1	1
	2=13-24	18			1	1
	3=25-36	18		1	1	1
	4=37-48	17	1	2	0.941176	0.941176
	5=49-60	14		1	1	0.941176
	6=61-72	13		1	1	0.941176
	7=73-84	12		3	1	0.941176
	8=85-96	9			1	0.941176
	9=97-108	9		3	1	0.941176
	10=109-120	6		6	1	0.941176

## Sheet: Calcoli Filippo
Specific disease mortality 10 anni	2.3
Overall survival 10 anni	88
Recurrence-free survival 10 anni	77
Recurrence free-survival Tis	91.7
Recurrence free-survival T1	84
Recurrence free-survival T2	77
Tis = 24
T1= 158
T2= 25

## Sheet: Foglio1
										A	O
								T2 sg	9	6.849	5.598		-1.251	1.565	0.228501
								T2 nsg	24	18.264	19.68		1.416	2.00506	0.109782
															0.338283
								T2= 76,1
								T2 sg= 62,2
								T2 nsg= 82
								T2 sg	9	6.984	4.797		-2.187	4.78297	0.684847
								T2 nsg	24	18.624	21.048		2.424	5.87578	0.315495
															1.00034
								T2= 77,6
								T2 sg= 53,
								T2 nsg= 87,7
